# 1 Exploring the microdiversity within marine bacterial taxa: Towards an 2 integrated biogeography in the Southern Ocean

3  
4 Schwob G<sup>1,5\*</sup>, Segovia NI<sup>4,5</sup>, González-Wevar CA<sup>2,5</sup>, Cabrol L<sup>3,5</sup>, Orlando J<sup>1</sup> and Poulin E<sup>1,5</sup>

5  
6 (1) Departamento de Ciencias Ecológicas, Facultad de Ciencias, Universidad de Chile,  
7 Santiago, Chile

8 (2) Instituto de Ciencias Marinas y Limnológicas & Centro Fondap IDEAL, Universidad Austral  
9 de Chile, Facultad de Ciencias, Valdivia, Chile

10 (3) Mediterranean Institute of Oceanography (MIO) UM 110, CNRS, IRD, Aix Marseille  
11 University, Univ Toulon, Marseille, France

12 (4) Universidad Católica del Norte, Coquimbo, Chile

13 (5) Instituto de Ecología y Biodiversidad, Santiago, Chile

14

15 \* Corresponding author: [guillaume.schwob@uchile.cl](mailto:guillaume.schwob@uchile.cl)

## 16 **Abstract**

17 The phylogeography traditionally correlates the genetic relationships among individuals  
18 within a macroorganism species, to their spatial distribution. Most microbial phylogeographic  
19 studies so far have been restricted to narrow geographical regions, mainly focusing on isolated  
20 strains, either obtained by culture or single-strain natural enrichments. However, the laborious  
21 culture-based methodology imposes a low number of studied individuals, leading to poor  
22 resolution of haplotype frequency estimation, making difficult a realistic evaluation of the genetic  
23 structure of natural microbial populations in the environment.

24 To tackle this limitation, we present a new approach to unravel the phylogeographic patterns of  
25 bacteria combining (i) community-wide survey by 16S rRNA gene metabarcoding, (ii) intra-

26 species resolution through the oligotyping method, and (iii) genetic and phylogeographic indices,  
27 as well as migration parameters, estimated from populational molecular data as traditionally  
28 developed for macroorganisms as models.

29 As a proof-of-concept, we applied this methodology to the bacterial genus *Spirochaeta*,  
30 classically reported as a gut endosymbiont of various invertebrates inhabiting the Southern Ocean  
31 (SO), but also described in marine sediment and in open waters. For this purpose, we centered  
32 our sampling into three biogeographic provinces of the SO; maritime Antarctica (King George  
33 Island), sub-Antarctic Islands (Kerguelen archipelago) and Patagonia in southern South America.  
34 Each targeted OTU was characterized by substantial intrapopulation microdiversity, a  
35 significant genetic differentiation and a robust phylogeographic structure among the three distant  
36 biogeographic provinces. Patterns of gene flow in *Spirochaeta* populations support the role of the  
37 Antarctic Polar Front (APF) as a biogeographic barrier to bacterial dispersal between Antarctic  
38 and sub-Antarctic provinces. Conversely, the Antarctic Circumpolar Current (ACC) appears as  
39 the main driver of connectivity between geographically distant sub-Antarctic areas such as  
40 Patagonia and Kerguelen archipelago, and between Kerguelen archipelago and maritime  
41 Antarctica. Additionally, we found that historical processes (drift and dispersal limitation)  
42 together govern up to 86% of the spatial turnover among *Spirochaeta* populations. Overall, our  
43 approach represents a substantial first attempt to bridge the gap between microbial and macrobial  
44 ecology by unifying the way to study phylogeography. We revealed that strong congruency with  
45 macroorganisms patterns at the populational level shaped by the same oceanographic structures  
46 and ecological processes.

47 **Keywords (3 to 10 required)**

48 Southern Ocean, Antarctic Polar Front, Antarctic Circumpolar Current, *Abatus*, *Spirochaeta*,  
49 oligotyping, microdiversity, phylogeography, 16S rRNA metabarcoding, Minimum Entropy  
50 Decomposition, Microbial Conveyor Belt

## 51 **Background**

52       Biogeography has traditionally investigated the geographic distribution of  
53 macroorganisms in the Eukaryota domain. However, during the last two decades, a growing  
54 number of studies has focused on the biogeography of prokaryotic microorganisms, taking  
55 advantage of the breakthrough and the constant advances of next-generation sequencing (NGS),  
56 which allow extensive surveys of previously inaccessible microbial diversity from a wide range  
57 of ecological contexts [1]. Although long debated in the past, it is now accepted that microbes  
58 do have biogeographic patterns, repeatedly illustrated by the observation of non-random  
59 community assemblages of various prokaryotic microorganisms [2-4]. Contrary to the  
60 contemporary driving factors (*i.e.* environmental selection) that have been extensively studied [5-  
61 9], the role of historical processes –past ecological and evolutionary events– onto the present-  
62 day distribution patterns of microorganisms remains poorly investigated. Initially, the consensus  
63 was that the rapid and widespread dispersal of microbes should erase any signal of past historical  
64 events [1]. Nevertheless, it is now clear that historical processes, such as the dispersal barriers  
65 and geographic distance, might substantially contribute to microbes' biogeography instead of  
66 environmental filtering [5, 10, 11]. For instance, biogeographic regionalization, isolation, and  
67 endemism have been reported for microbes, as well as in larger organisms, and evidence a  
68 predominant effect of geographic distance over environmental variations [12, 13].

69 To date, most of the microbial biogeographic patterns have been depicted at the whole  
70 community level [4, 14, 15]. Nevertheless, as observed in various empirical studies, a finer  
71 taxonomic scale generally allows better detection of geographic patterns [10, 16, 17]. Moreover,  
72 the ecological processes driving the biogeographic patterns at the community-level intrinsically  
73 result from the accumulation of micro-evolutive processes, *i.e.* mechanisms contributing to the  
74 genetic composition and diversity within populations, and how they vary in space and time [10,  
75 18]. The comprehensive description of these micro-evolutive processes requires considering  
76 intra-population diversity, as commonly applied in phylogeographic studies of macroorganisms.

77 Hence, microbial assembly processes need to be investigated at a finer taxonomic resolution than  
78 usually done by microbial biogeographic surveys and consider the "microdiversity" within groups  
79 [17, 18].

80 The oceans have been considered among the most challenging environments to test hypotheses  
81 about microbial biogeography, mainly due to the speculated transport of organisms over large  
82 distances by marine currents and the absence of perceivable marine barriers impeding potential  
83 dispersal events [19]. However, oceanic fronts separating different water masses have been  
84 recently identified as major microbial dispersal barriers [20]. The Southern Ocean (SO) is a vast  
85 region representing approximately 20% of the world ocean surface. It surrounds Antarctica, and  
86 its northern limit is the Subtropical Front [21]. Two main oceanographic structures shape the SO  
87 biogeography; the Antarctic Polar Front (APF) and the Antarctic Circumpolar Current (ACC). The  
88 APF is classically considered a harsh north-south obstacle for dispersing marine organisms due  
89 to the brutal change in water temperature and salinity [22, 23]. Phylogenetic reconstruction  
90 achieved on various vertebrate and invertebrate taxa clearly supports the role of the APF on their  
91 respective diversification processes [24-29]. Accordingly, and based on the described  
92 distribution of species, biogeographers have traditionally recognized Antarctica and sub-  
93 Antarctica as the two main biogeographic provinces of the SO, even if several provinces have  
94 been proposed within each of them [30]. Contrarily, outside the APF, the ACC is generally  
95 described as the driver of genetic connection across the sub-Antarctic zone due to its clockwise  
96 circulation [31-35]. Intraspecific genetic and phylogeographic studies of macroorganisms have  
97 demonstrated the ACC's role in connecting geographically distant sub-Antarctic provinces [32,  
98 36-38]. The marine biota distribution in this region has been synthesized in the Biogeographic  
99 Atlas of the SO, providing updated biogeographic information of a wide range of benthic and  
100 pelagic taxa from Metazoan, macroalgae, and phytoplankton [39]. Despite being the most  
101 abundant and diverse domains on Earth, Bacteria and Archaea were not included in the SO Atlas  
102 [40]. Even when marine microbial communities have been previously characterized in the

103 region, their geographic distribution's underlying drivers remain poorly understood. Studies  
104 conducted at the whole community-level support (i) the role of ACC as a likely efficient  
105 mechanism of circumpolar microbial transport and dispersal [3, 41] and (ii) the role of APF as  
106 the main dispersal barrier separating Antarctic and sub-Antarctic microbial assemblages [3, 20,  
107 42]. However, the observed biogeographic patterns' underlying evolutionary processes have not  
108 been elucidated and would intrinsically rely on bacterial populations' microdiversity.

109 Targeting the intraspecific diversity using NGS data requires specific computational methods to  
110 discriminate the stochastic noise caused by random sequencing errors from those associated with  
111 biologically significant diversity [10, 17, 43]. For this purpose, an algorithm called "Minimum  
112 Entropy Decomposition" (MED) relying on the oligotyping method has been proposed by Eren *et*  
113 *al.* [44]. This algorithm allows to identify true sequence variants (*i.e.* oligotypes) within the  
114 "Operational Taxonomic Units" (OTUs), classically defined at 97% identity of the bacterial 16S  
115 rRNA gene. This approach has already been successfully used to unravel fine-grained  
116 biogeographic patterns of bacterial microdiversity in Arctic sediments, such as variations in  
117 oligotype distribution according to spatial and environmental parameters [45]. Moreover,  
118 focusing on the sulfate-reducing genus *Desulfotomaculum* in Arctic marine sediments, Hanson  
119 *et al.* [11] showed clear biogeographic patterns –attributed to historical factors associated with  
120 past environments– were only evident at the microdiversity level achieved with the oligotyping  
121 method. However, the microevolutionary processes causing the microdiversity were not assayed,  
122 and the study did not encompass large-scale distribution among different biogeographic  
123 provinces, as it was restricted to the west coast of Spitsbergen, Svalbard in the Arctic Ocean.

124 In the present proof-of-concept study, we aim to bring new insights on the evolutionary processes  
125 driving microbial biogeography across different provinces of the SO by combining (i) community-  
126 wide surveying provided by the high-throughput sequencing of the 16S rRNA gene, (ii) intra-  
127 species resolution obtained through the oligotyping method implemented in the MED pipeline,  
128 and (iii) phylogeographic analysis as traditionally developed for macroorganisms as models.

129 Considering the SO as an outstanding idoneous frame, we investigated the geographic  
130 distribution of genetic diversity of marine bacterial taxa across three main biogeographic  
131 provinces: maritime Antarctica (King George Island, South Shetland Islands, West Antarctic  
132 Peninsula), sub-Antarctic Islands of the Indian Ocean (Kerguelen archipelago) and southern South  
133 America (Patagonia), encompassing sites separated by the APF, and others connected through  
134 the ACC.

135 As the contribution of geography to biological diversity patterns (*i.e.* dispersal limitation) is  
136 stronger on habitat-specialists (*i.e.* taxa found in habitat with high selective strength) [46, 47],  
137 and emphasized within homogeneous habitats distributed across large spatial scales [10, 48, 49],  
138 we focused our study on the bacterial community associated to a specific habitat: the gut of  
139 *Abatus* irregular sea urchins. The *Abatus* genus is distributed across the SO and gathers various  
140 sibling species homologous in ecology and habitat, such as *Abatus cavernosus* in southern South  
141 America, *Abatus cordatus* in Kerguelen Islands, and *Abatus agassizii* in maritime Antarctica [50-  
142 53]. Since these species lack specialized respiratory structure, they are restricted to the well-  
143 oxygenated coarse sediments found at shallow depth (typically 1 to 3 meters depth) in sheltered  
144 bays, protected from the swell [51]. Within the *Abatus* hosts, we focused on a specific micro-  
145 environment –the gut tissue– previously described to act as a selective filter of the external  
146 sediment microbiota, as illustrated by the reduction of bacterial diversity at both taxonomic and  
147 functional levels [54]. Working on the gut community with supposedly more limited dispersal  
148 capacity, through a high sequencing depth, is expected to (i) provide robust coverage of the  
149 bacterial diversity, (ii) minimize the relevance of environmental filtering between provinces, (iii)  
150 emphasize the contribution of geographic and oceanographic factors, and therefore (iv) enhance  
151 the detection of phylogeographic signals across the SO [10]. As a model taxon to explore  
152 bacterial phylogeography in the SO, we chose the *Spirochaeta* genus (phylum *Spirochaetes*).  
153 *Spirochaeta* bacteria are recognized as the most prevalent and abundant genus in the *Abatus* gut  
154 tissue [54]. Moreover, spirochaetes are classically found in marine benthic sediments [55, 56]

155 and, to a lesser extent, in the water column (Ocean Barcode Atlas;  
156 <http://oba.mio.osupytheas.fr/ocean-atlas/>). Thus, due to its ease of detection and ubiquity across  
157 biogeographic provinces, *Spirochaeta* represents an illustrative model to validate our  
158 methodology and explore marine bacteria's spatial genetic patterns, from genus to population  
159 level. We hypothesized that the strong biogeographic barrier between South America and  
160 maritime Antarctica classically observed in the literature for macroorganisms (*i.e.* vicariance  
161 process) also affects the fine-scale genetic structure and the phylogeographic patterns within  
162 *Spirochaeta* OTUs. Besides, the ACC-mediated connectivity among sub-Antarctic provinces  
163 should be reflected by a greater genetic homogeneity of *Spirochaeta* populations between South  
164 American sites and the Kerguelen Islands, rather than with maritime Antarctica. Alternatively, the  
165 potential high dispersal capacity of *Spirochaeta* taxa may result in the absence of genetic and  
166 phylogeographic structure across the SO.

## 167 Methods

### 168 **Sampling collection, DNA extraction, and 16S rRNA gene library preparation**

169 Adult *Abatus* individuals were sampled from four localities across the SO, including two sites in  
170 Patagonia, southern South America (Possession Bay, PAT1 and Puerto Deseado, PAT2), one site  
171 in Kerguelen Islands (Port-aux-Français, KER), and one site in the West Antarctic Peninsula (King  
172 George Island, KGI) (Figure 1, Table 1).

**Table 1. Experimental design and sequencing data**

| Locality           | Province            | GPS coordinates | Date    | Designation | Sample types       | N  | Nseq. (Relat. Abund.) |
|--------------------|---------------------|-----------------|---------|-------------|--------------------|----|-----------------------|
| King George Island | Maritime Antarctica | 62°12'55.3"S    | 01-2019 | KGI         | External sediments | 8  | 255786 (10%)          |
|                    |                     | 58°56'43.8"W    |         |             | Gut tissue         | 31 | 563383 (22%)          |
| Bahía Posesión     | Patagonia           | 52°19'52.97"S   | 07-2019 | PAT1        | External sediments | 6  | 271828 (11%)          |
|                    |                     | 69°29'10.50"W   |         |             | Gut tissue         | 15 | 447892 (18%)          |
| Puerto Deseado     | Patagonia           | 47°45'07.0"S    | 12-2016 | PAT2        | External sediments | NA | NA                    |
|                    |                     | 65°52'04.0"W    |         |             | Gut tissue         | 10 | 470087 (18%)          |
| Port-aux-Français  | Kerguelen Island    | 49°21'13.32"S   | 11-2017 | KER         | External sediments | 5  | 92564 (4%)            |
|                    |                     | 70°13'8.759"E   |         |             | Gut tissue         | 14 | 440498 (17%)          |

N: number of samples, Nseq.: total number of cleaned sequences obtained, Relat. Abund.: (relative abundance in the global dataset).



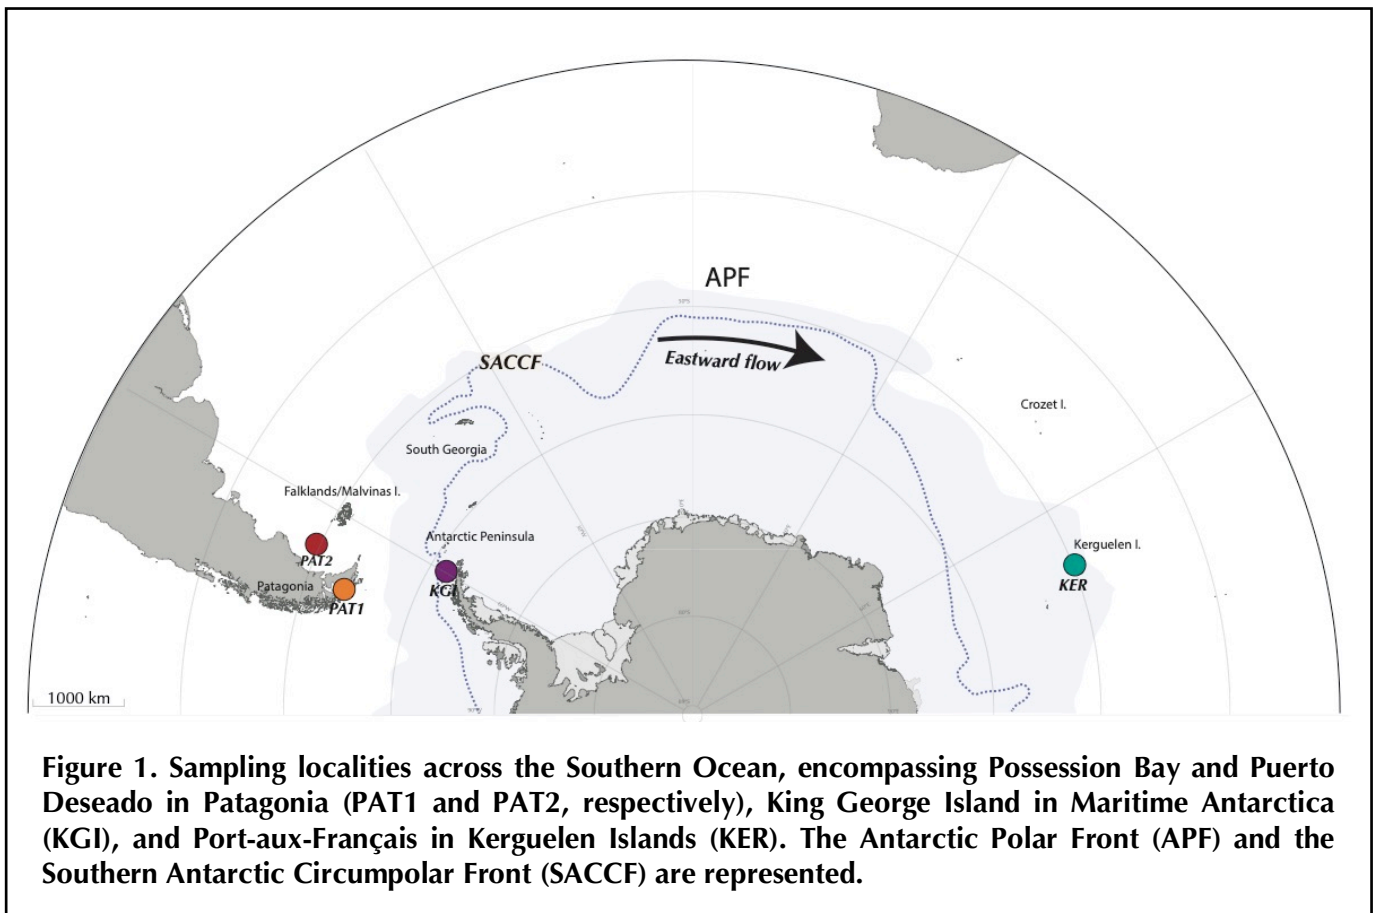

173 Marine surface sediments (0 – 5 cm, referred here as "external sediment") were also sampled in  
174 each *Abatus* population's immediate vicinity as the ingested food source of the sea urchins. Due  
175 to logistic constraints, it was not possible to collect external sediment in the PAT2 site. All  
176 individuals were dissected under sterile conditions to collect the whole digestive tract minus the  
177 caecum (identified as "gut tissue") following Schwob *et al.* [54]. Gut tissue samples were gently  
178 rinsed with nuclease-free sterile water to remove the content (*i.e.* in sediment) and were then  
179 individually homogenized using mortar and pestle under a laminar-flow cabinet. Genomic DNA  
180 was extracted from the totality of the homogenized gut tissue samples using the DNeasy  
181 PowerSoil® Kit (Qiagen, Hilden, Germany) following the manufacturer's recommendations.  
182 A metabarcoding approach was used to assess the bacterial community composition in the  
183 external sediment and *Abatus* gut tissue samples. Briefly, extracted genomic DNA was used as  
184 the template for PCR amplification using the primers 515F 5'-GTGYCAGCMGCCGCGGTA-3'  
185 and 926R 5'-CCCCGYCAATTCMTTTRAGT-3' [57]. The PCR conditions and 16S rRNA gene  
186 library preparation were the same as described in Schwob *et al.* [54].



## 187 **Metabarcoding data processing**

188 External sediment and gut tissue amplicons were sequenced using the paired-end sequencing  
189 technology (2 x 250 bp) on the Illumina MiSeq platform at the UWBC DNA Sequencing Facility  
190 (University of Wisconsin-Madison, USA). Reads of 16S rRNA were processed using the open-  
191 source software MOTHUR v1.44.0 following Schwob *et al.* [54]. Once the raw reads were  
192 processed into Operational Taxonomic Units (OTUs) at 97% identity threshold, we applied a  
193 filter of relative abundance at > 0.0001% as recommended by Bokulich *et al.* [58]. Following  
194 this, a taxonomic classification was performed with the *classify.otu* function and the SILVA  
195 database v138 implemented in MOTHUR. An OTU table of *Spirochaeta* was edited (*i.e.* all OTUs  
196 assigned to the genus *Spirochaeta*), and converted into a presence/absence matrix. Bray-Curtis  
197 and Unweighted Unifrac distances were calculated from the OTU presence/absence matrix and  
198 used to perform a Non-Metric Multidimensional Scaling (NMDS) with the *metaMDS* function of  
199 the ADE4 package [59]. The NMDS was plotted through a scatter diagram using the *s.class*  
200 function implemented in ADE4. The locality's contribution to the *Spirochaeta* OTUs composition  
201 in gut tissue samples was tested with permutational multivariate analysis of variance  
202 (permanova), using *adonis* and *pairwise.adonis* functions implemented in *vegan* and  
203 *pairwiseAdonis* R packages, respectively [60, 61].

204 A subset of the three most abundant *Spirochaeta* OTUs present in the four localities was retained  
205 for further analysis (Table S2). All the sequences assigned to the selected *Spirochaeta* OTUs were  
206 retrieved using the *bin.seqs* command in MOTHUR. Finally, the resulting fasta files were processed  
207 independently through the Minimum Entropy Decomposition pipeline following Eren *et al.* [44].

## 208 **Minimum Entropy Decomposition**

209 Minimum Entropy Decomposition (MED) pipeline was used to identify nucleotidic  
210 polymorphism at fine-scale resolution (> 3% identity) within the 16S rRNA gene sequences from  
211 *Spirochaeta* OTUs. Briefly, MED employs the Shannon entropy algorithm to discriminate  
212 biologically meaningful variations of closely related sequences from the stochastic noise caused

213 by random sequencing errors, focusing on informative-rich variable nucleotide positions [44,  
214 62]. The resulting taxonomic units will be referred to as *Spirochaeta* oligotypes. Unsupervised  
215 oligotyping was carried out individually on *Spirochaeta* OTUs using the default dynamically  
216 computed threshold from which entropy is considered as zero (-m). Additionally, each identified  
217 oligotype had to have a default minimum relative abundance of 2% in the OTU sequences  
218 dataset [44]. Accumulation curves of oligotypes' richness were computed for each *Spirochaeta*  
219 OTU at a 95% confidence interval using the package INEXT [63] in R v3.6.0 [64]. Pie charts of  
220 the relative site contributions in the total abundance of the *Spirochaeta* OTUs oligotypes were  
221 performed with the *pie* function in the package GRAPHICS in R v3.6.0.

## 222 **Genetic diversity and structure of *Spirochaeta* populations**

223 The number of oligotypes ( $k$ ), the oligotype diversity ( $H$ ), the number of discriminant sites ( $S$ ) and  
224 the pairwise difference between sequences ( $II$ ) were estimated individually for each *Spirochaeta*  
225 OTU using the packages PEGAS [65] and APE v5.3.0 [66] in R v3.6.0. For comparative purposes  
226 among sites with unequal sample sizes, a composite bootstrapping script was written to rarefy  
227 the sequence datasets to the minimum number of sequences per site and repeat the rarefaction  
228 with 1,000 re-samplings. Confidence intervals at 95% of genetic diversity indices were then  
229 calculated using these iteration values. The genetic differentiation ( $F_{ST}$  and  $\Phi_{ST}$ ) among *Spirochaeta*  
230 populations was analyzed using the software ARLEQUIN v3.5.2 [67] with 1,000 permutations and  
231 a significance threshold at 0.05. Phylogeographic differentiation was also estimated with the  
232 nearest-neighbor statistic  $S_{nn}$  [68], and the significance of  $S_{nn}$  estimates was tested with a  
233 permutation test through DNASP v5.10.01 [69]. The reconstruction of oligotype networks was  
234 performed using the Median Joining method with the software Populational Analysis with  
235 Reticulate Trees v1.7.0 in PopART [70]. Oligotype abundances were normalized by the number  
236 of sequences per locality for a given OTU to improve the networks' readability.

## 237 **Quantification of selection, dispersal, and drift**

238 The relative contribution of stochastic (*i.e.* dispersal, drift) and deterministic (*i.e.* selection)  
239 processes, also referred to as historical and contemporary processes respectively, on *Spirochaeta*  
240 oligotype assembly was measured for the selected OTU by following the analytical framework  
241 described in Stegen *et al.* [71] and illustrated by Feng *et al.* [72]. In a nutshell, the approach relies  
242 on the comparison of the phylogenetic turnover between communities across samples ( $\beta$ MNTD;  
243  $\beta$  mean nearest-taxon distance) to a null distribution of  $\beta$ MNTD, and denoted as the  $\beta$ -nearest  
244 taxon index ( $\beta$ NTI). The phylogenetic tree required for the  $\beta$ MNTD/ $\beta$ NTI calculations was  
245 generated using PhyML v3.0 [73], and the oligotype sequences of *Spirochaeta* previously aligned  
246 with MUSCLE [74].  $\beta$ NTI values indicate that taxa between two communities are more (*i.e.*  $\beta$ NTI  
247  $< -2$ ) or less (*i.e.*  $\beta$ NTI  $> +2$ ) phylogenetically related than expected by chance, thus suggesting  
248 that communities experience homogenizing or variable selection, respectively [75].  $\beta$ NTI values  
249 ranging from -2 to +2 indicate a limited selection effect and point to dispersal limitation and  
250 ecological drift out as possible community composition drivers. To further disentangle the  
251 respective effect of these two alternative processes, we calculated the pairwise Bray-Curtis-based  
252 Raup-Crick dissimilarity index ( $RC_{\text{Bray}}$ ) between sites [76], weighted by oligotype abundance [71].  
253 For this, we used an optimized version of the initial script of Stegen *et al.* [71], developed by  
254 Richter-Heitmann [77], and available via GitHub ([https://github.com/FranzKrah/raup\\_crick](https://github.com/FranzKrah/raup_crick)).  
255  $RC_{\text{Bray}}$  values  $< -0.95$  and  $> +0.95$  correspond to communities that have –respectively– more or  
256 fewer taxa in common than expected by chance, and therefore indicate that community turnover  
257 is driven by homogenising dispersal ( $RC_{\text{Bray}} < -0.95$ ) or dispersal limitation plus drift ( $RC_{\text{Bray}} > +$   
258  $0.95$ ). On the contrary,  $RC_{\text{Bray}}$  values  $> -0.95$  and  $< +0.95$  are indicative of ecological drift [78].  
259 Both  $\beta$ NTI and  $RC_{\text{Bray}}$  null models included 999 randomizations [71].

## 260 **Testing for isolation by distance (IBD) and environment (IBE)**

261 To disentangle the relative effect of geographic distance and abiotic environmental differences  
262 on the *Spirochaeta* oligotype composition between samples, we used the distance-based multiple  
263 matrix regression with randomization (MMRR) approach [79]. We extracted a set of 9

264 environmental variables for each of our sampling site from the Bio-ORACLE database [80],  
265 including pH, the means of nitrate, silicate, and phosphate concentrations, and the means at the  
266 mean depth of seawater salinity, dissolved oxygen concentration, seawater temperature,  
267 seawater temperature range and chlorophyll concentration. All environmental variables were  
268 standardized  $((x_i - \bar{x})/sd(x))$ , and were then analyzed through Principal Components Analysis  
269 (PCA). As a high percentage of the variation among localities was explained by the first  
270 component (PC1, >91%), we transformed the scores of PC1 into Euclidean distance using the  
271 *vegdist* function in the *vegan* package in R to use it as the environmental distance matrix further.  
272 The longitude and latitude coordinates were converted into kilometers using the *earth.dist*  
273 function implemented in the FOSSIL package in R [81]. The geographic distances were  
274 transformed using the Hellinger method through the *decostand* function of the *vegan* package in  
275 R. The dissimilarity matrix of *Spirochaeta* oligotype composition among samples was also created  
276 from Bray-Curtis distances using the *vegdist* function of the R package *vegan*. Finally, to evaluate  
277 the relative weight of environmental and geographic distance matrices, an MMRR was performed  
278 using the R package PopGenReport [82], and the correlation coefficients and their significance  
279 were estimated based on 10,000 random permutations.

### 280 **Connectivity among *Spirochaeta* populations**

281 The amount and direction of gene flow among *Spirochaeta* populations were estimated using the  
282 coalescent-based program LAMARC v2.1.10 [83]. A total of ten runs was performed for each  
283 *Spirochaeta* OTU, consisting of likelihood searches of 20 initial and two final chains, with a  
284 minimum of 500 and 10,000 recorded trees, respectively, and sampling every 20 generations  
285 after a burn-in of 1,000 genealogies. The effective number of migrants per generation (Nm)  
286 among *Spirochaeta* populations was calculated by multiplying the Maximum Likelihood  
287 Estimates (MLE) of the mutation parameter ( $\theta$ ) by the migration parameter (M), both estimated  
288 through the LAMARC program. We present the mean and standard deviation of the estimated Nm  
289 values obtained from the ten runs for each *Spirochaeta* OTU.

290 **Results**

291 **Sequencing performance and OTUbased analysis**

292 A total of 4,184,226 raw reads was generated from the 91 samples of external sediments and gut  
293 tissues. Once processed, 2,542,038 cleaned sequences distributed into 727 OTUs were obtained  
294 from the external sediment and gut tissue samples (details provided in Table 1). Out of this  
295 condensed dataset, 425,613 sequences associated with the *Spirochaeta* genus were retrieved,  
296 representing a total of 10 OTUs.

297 Both Bray-Curtis and Unweighted Unifrac distance methods did not reveal any difference in  
298 *Spirochaeta* OTU composition between the Patagonian sites (PAT1 and PAT2) (Figure 2A and  
299 2B, Additional file 1).

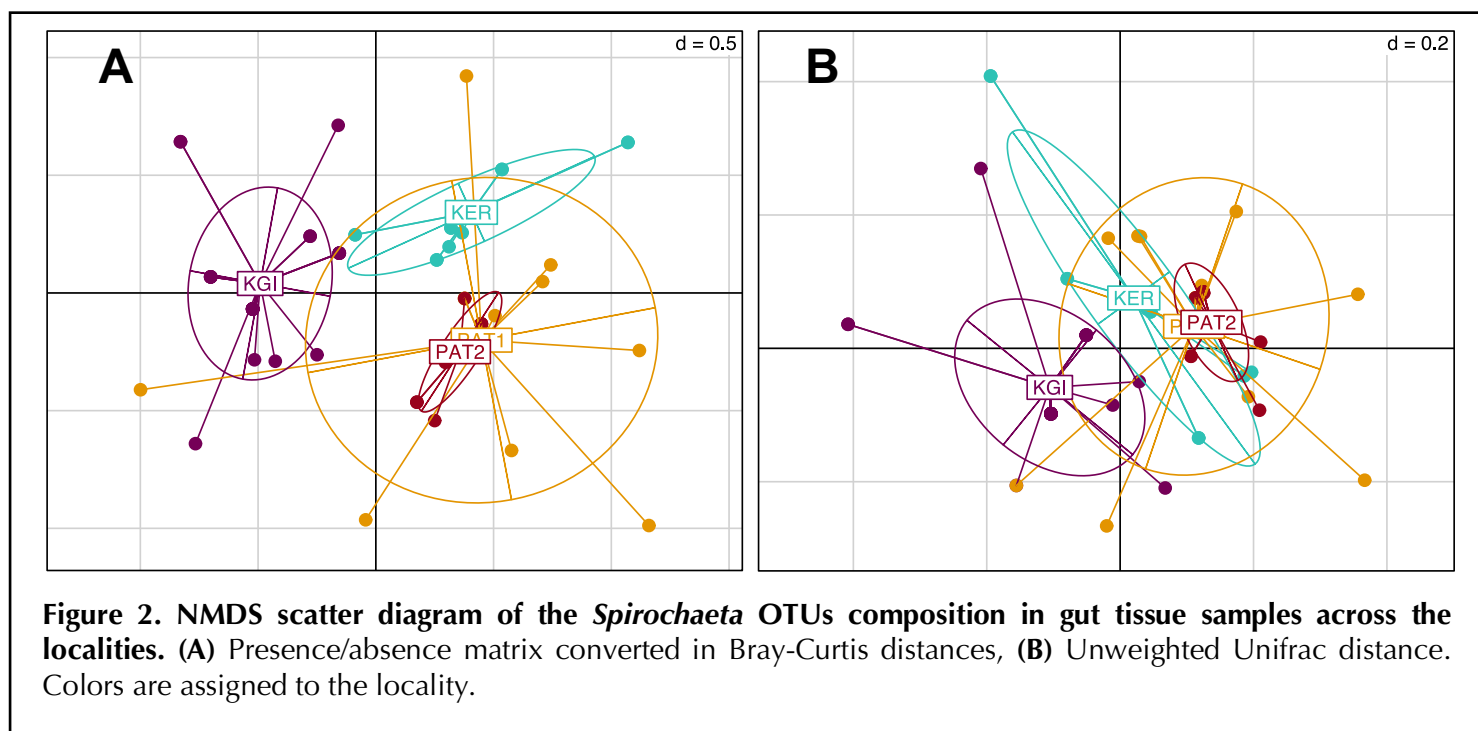

300 Conversely, Kerguelen Islands (KER) and maritime Antarctic (KGI) sites were significantly different  
301 from each other in terms of *Spirochaeta* OTU composition and with the Patagonian ones  
302 (Additional file 1).

303 The relative abundance analyses among the 10 *Spirochaeta* OTUs (Figure 3) showed four of them  
304 were shared among all the Southern Ocean's sampled provinces. Three OTUs (OTU6, OTU7,  
305 and OTU532) were more abundant in maritime Antarctica (KGI), three (OTU23, OTU42, and

306 OTU221) were predominantly found in the Patagonian locality PAT2, three (OTU40, OTU278,  
 307 and OTU561) were more abundant in the Patagonian locality PAT1, and a single one (OTU349)  
 308 was predominant in Kerguelen Islands (Figure 3).

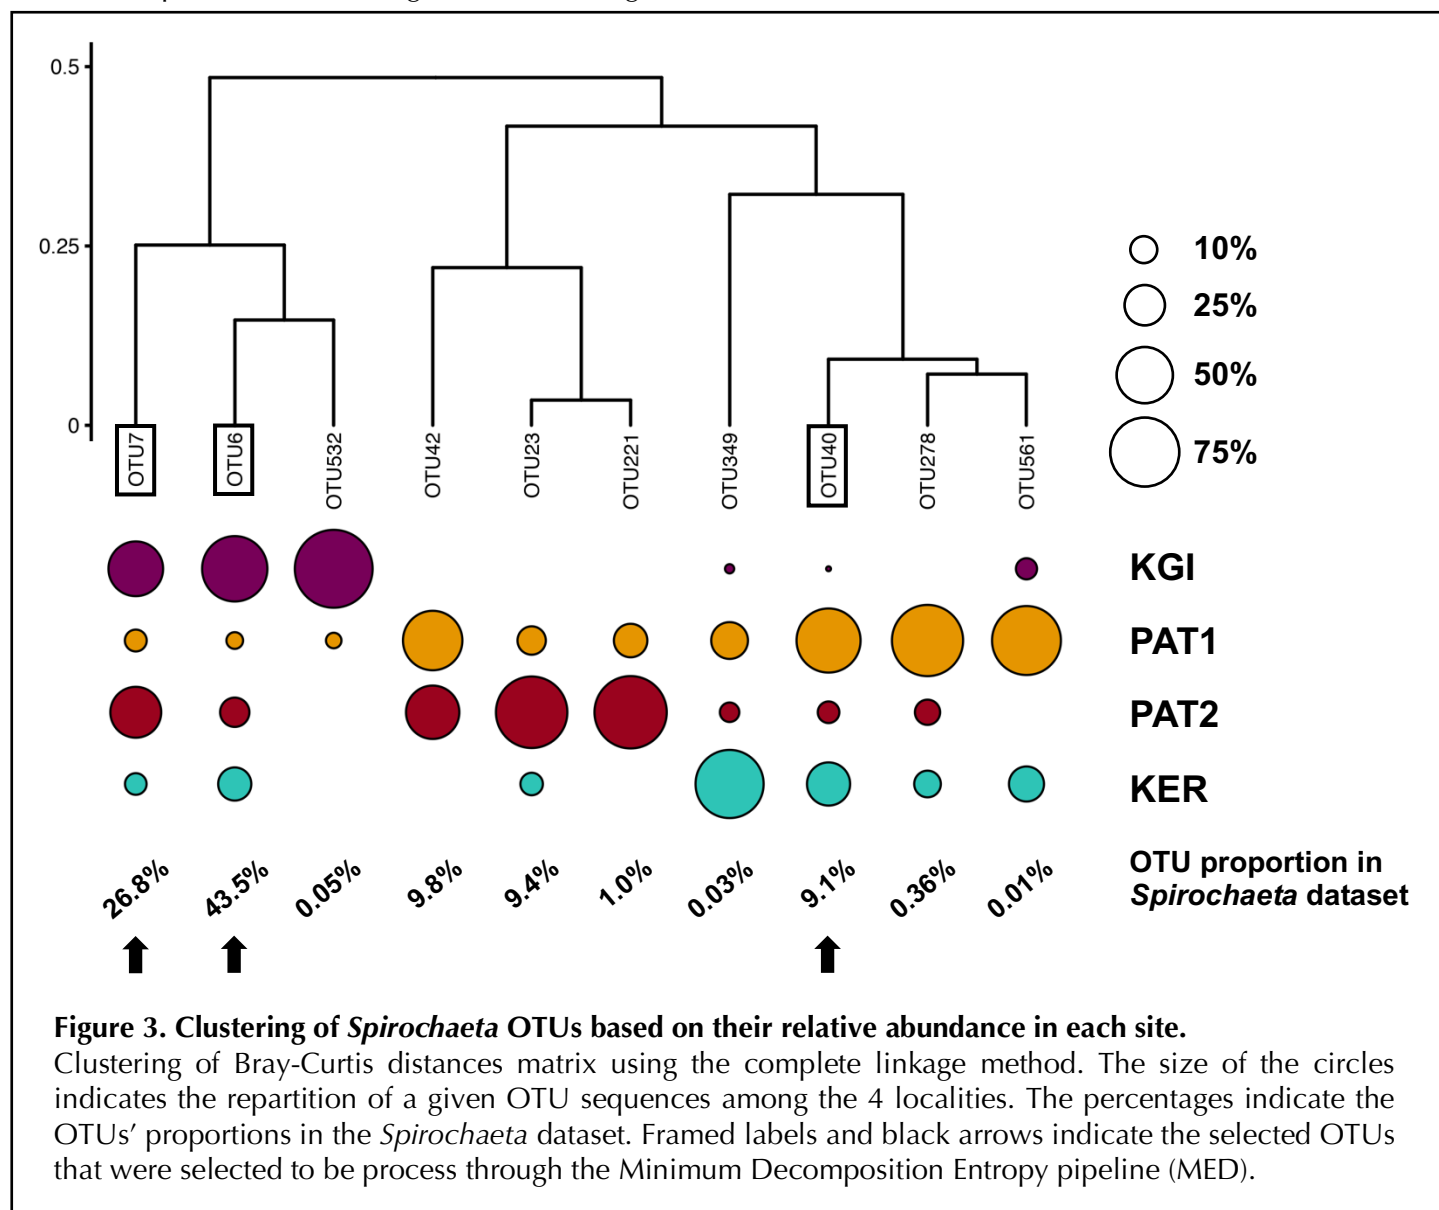

309 To test the genetic and phylogeographic structure of *Spirochaeta* at the broadest geographic scale  
 310 available through our dataset, we selected the three most abundant *Spirochaeta* OTUs which  
 311 were detected within the four localities of the dataset (*i.e.* OTU6, OTU7, and OTU40). These  
 312 three selected co-distributed OTUs are good targets to constitute a metapopulation, which is a  
 313 meaningful ecological unit of distinct local populations separated by gaps in habitats and  
 314 interconnected to some extent via dispersal events of individuals [84]. The relative abundance in

315 sample types, the closest sequence retrieved from Blast analysis, and the distribution of these  
 316 OTUs among the localities are provided in the Additional files 2 and 3.

### 317 **Microdiversity within *Spirochaeta* OTUs**

318 A total of 48, 96, and 48 oligotypes were defined for OTU6, OTU7, and OTU40, respectively  
 319 (Additional file 4). Accumulation curves of OTU6, OTU7, and OTU40 oligotypes reached  
 320 saturation in almost all localities indicating that the overall majority of *Spirochaeta* microdiversity  
 321 has been found within the analyzed samples (Additional file 5). Diversity indices measured as  
 322  $N$ ,  $k$ ,  $S$ ,  $h$ , and  $\Pi$  for each OTU in each locality are provided in Table 2.

**Table 2. Summary of oligotypes number and genetic indices per OTU and per site for the three most abundant *Spirochaeta* OTUs found in all sampling localities.**

| OTU   | Site | $N$     | $k$    | $S$    | $H$             | $\Pi$           |
|-------|------|---------|--------|--------|-----------------|-----------------|
| OTU6  | KGI  | 125,112 | 26 ± 0 | 24 ± 0 | 0.4879 ± 0.0004 | 0.7919 ± 0.0012 |
|       | PAT1 | 6,452   | 18 ± 0 | 8 ± 0  | 0.6701 ± 0.0000 | 1.5772 ± 0.0000 |
|       | PAT2 | 22,545  | 22 ± 0 | 12 ± 0 | 0.6574 ± 0.0002 | 1.5426 ± 0.0006 |
|       | KER  | 29,448  | 33 ± 1 | 29 ± 0 | 0.5677 ± 0.0003 | 0.9687 ± 0.0011 |
| OTU7  | KGI  | 53,645  | 31 ± 0 | 32 ± 0 | 0.5555 ± 0.0003 | 1.4443 ± 0.0021 |
|       | PAT1 | 7,249   | 69 ± 0 | 37 ± 0 | 0.8036 ± 0.0000 | 2.0247 ± 0.0003 |
|       | PAT2 | 44,509  | 60 ± 0 | 33 ± 0 | 0.7958 ± 0.0002 | 1.7336 ± 0.0011 |
|       | KER  | 7,021   | 43 ± 0 | 37 ± 0 | 0.6306 ± 0.0000 | 1.0261 ± 0.0000 |
| OTU40 | KGI  | 47      | 4 ± 0  | 4 ± 0  | 0.6984 ± 0.0000 | 1.6606 ± 0.0000 |
|       | PAT1 | 24,612  | 32 ± 0 | 14 ± 0 | 0.3741 ± 0.0007 | 0.4922 ± 0.0011 |
|       | PAT2 | 2,423*  | 34 ± 0 | 11 ± 0 | 0.3816 ± 0.0000 | 0.4903 ± 0.0000 |
|       | KER  | 11,017  | 12 ± 0 | 8 ± 0  | 0.0681 ± 0.0004 | 0.0913 ± 0.0006 |

$N$ : number of sequences,  $k$ : number of oligotypes,  $S$ : number of polymorphic sites,  $H$ : genetic diversity,  $\Pi$ : mean number of pairwise diversity. The mean and standard deviation were calculated from a total of 1,000 bootstraps, performed by randomly subsampling per site a number of sequences equal to the minimum number of sequences obtained among sites for a given OTU. \* In the case of OTU40, the number of sequences in the PAT2 site was used to perform the resampling.

323 The genetic diversity ( $H$ ) ranged from 0.07 (OTU40 in KER) to 0.80 (OTU7 in PAT1) across  
 324 localities (Table 2). Patagonian sites exhibited higher oligotype and nucleotide diversity for OTU6  
 325 and OTU7 than maritime Antarctica and Kerguelen Islands localities. In contrast, the genetic



326 diversity of the OTU40 oligotypes was higher in the maritime Antarctic site and lower for the  
 327 Kerguelen population.

### 328 Populations differentiation and phylogeographic structure of *Spirochaeta* oligotypes

329 Independently of the OTU considered, the genetic ( $F_{ST}$ ) and phylogeographic ( $\phi_{ST}$ ) structures  
 330 between the two closest localities (*i.e.* Patagonian sites PAT1 and PAT2) were extremely to  
 331 moderately low. In the case of the OTU40, the genetic diversity and frequencies of *Spirochaeta*  
 332 oligotypes were fully homogenous between PAT1 and PAT2, as indicated by the non-significant  
 333 values of  $F_{ST}$  and  $\phi_{ST}$  comparisons (Table 3).

**Table 3. Genetic ( $F_{ST}$ ) and phylogeographic structure ( $\phi_{ST}$ ) of the *Spirochaeta* populations among localities.**

| OTU   | Index       | Locality | KGI    | PAT1    | PAT2   | KER |
|-------|-------------|----------|--------|---------|--------|-----|
| OTU6  | FST         | KGI      | -      | 0       | 0      | 0   |
|       |             | PAT1     | 0.4428 | -       | 0      | 0   |
|       |             | PAT2     | 0.4417 | 0.0026  | -      | 0   |
|       |             | KER      | 0.0654 | 0.3856  | 0.3829 | -   |
|       | $\phi_{ST}$ | KGI      | -      | 0       | 0      | 0   |
|       |             | PAT1     | 0.5371 | -       | 0      | 0   |
|       |             | PAT2     | 0.5360 | 0.0027  | -      | 0   |
|       |             | KER      | 0.1041 | 0.5063  | 0.4933 | -   |
| OTU7  | FST         | KGI      | -      | 0       | 0      | 0   |
|       |             | PAT1     | 0.3436 | -       | 0      | 0   |
|       |             | PAT2     | 0.3254 | 0.0726  | -      | 0   |
|       |             | KER      | 0.3902 | 0.0568  | 0.1734 | -   |
|       | $\phi_{ST}$ | KGI      | -      | 0       | 0      | 0   |
|       |             | PAT1     | 0.4393 | -       | 0      | 0   |
|       |             | PAT2     | 0.5361 | 0.1341  | -      | 0   |
|       |             | KER      | 0.3967 | 0.1312  | 0.3429 | -   |
| OTU40 | FST         | KGI      | -      | 0       | 0      | 0   |
|       |             | PAT1     | 0.5549 | -       | 0.4505 | 0   |
|       |             | PAT2     | 0.5445 | <0.0001 | -      | 0   |
|       |             | KER      | 0.8491 | 0.7358  | 0.8614 | -   |
|       | $\phi_{ST}$ | KGI      | -      | 0       | 0      | 0   |
|       |             | PAT1     | 0.8326 | -       | 0.2793 | 0   |
|       |             | PAT2     | 0.8278 | <0.0001 | -      | 0   |
|       |             | KER      | 0.9354 | 0.7398  | 0.8652 | -   |

Structure values are beneath each diagonal and  $p$ -values are above them.  $p$ -values were obtained through 1,000 permutations and the significance level was set < 0.05.  $p$ -values of 0 indicate value < 0.00001.

334 Contrarily, higher values of  $F_{ST}$  and  $\Phi_{ST}$  comparisons were recorded among the three provinces  
335 considered in this study (Patagonia, PAT1/PAT2; maritime Antarctica, KGI; Kerguelen Islands,  
336 KER) (Table 3). Consistently, the distribution of the *Spirochaeta* oligotypes was geographically  
337 discontinuous across the localities, with various province-specific oligotypes (Additional file 4).  
338 Two exceptions were observed in the case of maritime Antarctica and Kerguelen Islands (KGI  
339 and KER) comparisons for both OTU6 and OTU7, with relatively lower values of  $F_{ST}$  and  $\Phi_{ST}$  (Table  
340 3). The Snn test for phylogeographic structure among all sites was significant with statistic values  
341  $\geq 0.5$  (i.e. OTU6; Snn = 0.50,  $p$ -value < 0.0001, OTU7; Snn = 0.57,  $p$ -value < 0.0001, OTU40;  
342 Snn = 0.50,  $p$ -value < 0.0001). All in all, these results indicate the existence of both genetically  
343 and geographically differentiated *Spirochaeta* populations across the three biogeographic  
344 provinces sampled.

345 Within the 48 oligotypes identified in the OTU6, 11 (~23%) were private to one of the three  
346 provinces (Patagonia, maritime Antarctica, or the Kerguelen Islands), and more than half were  
347 exclusive to Kerguelen Islands (Additional file 4). Maritime Antarctic and Kerguelen Islands (KGI  
348 and KER) shared 27 (~66%) of their oligotypes. The Patagonian localities (PAT1/PAT2) shared 18  
349 of the 23 total oligotypes (~78%) observed in this province (Figure 4, Table S3). A total of five  
350 (~10%) oligotypes were broadly distributed across all localities. Oligotype network of OTU6  
351 showed short genealogies and the presence of at least five dominant oligotypes. The dominant  
352 oligotype in Patagonia (PAT1/PAT2), and the dominant oligotype in maritime Antarctica and  
353 Kerguelen Islands (KGI/KER), were separated by a single substitution (Figure 4).

354 In the case of OTU7, the percentage of private oligotypes was almost the same as the OTU6,  
355 with 21 (~22%) oligotypes exclusive to one of the provinces (Additional file 4). The dominant  
356 oligotype was different between maritime Antarctic and Kerguelen Islands localities (KGI and  
357 KER) (Figure 4). While most oligotypes from Kerguelen Islands (KER) were detected in at least one  
358 of the Patagonian sites (PAT2 or PAT1) (~94%), fewer oligotypes from maritime Antarctica (KGI)

359 were observed in Kerguelen Islands (~68%) and even fewer in the Patagonian localities (~62%)  
360 (Figure 4).

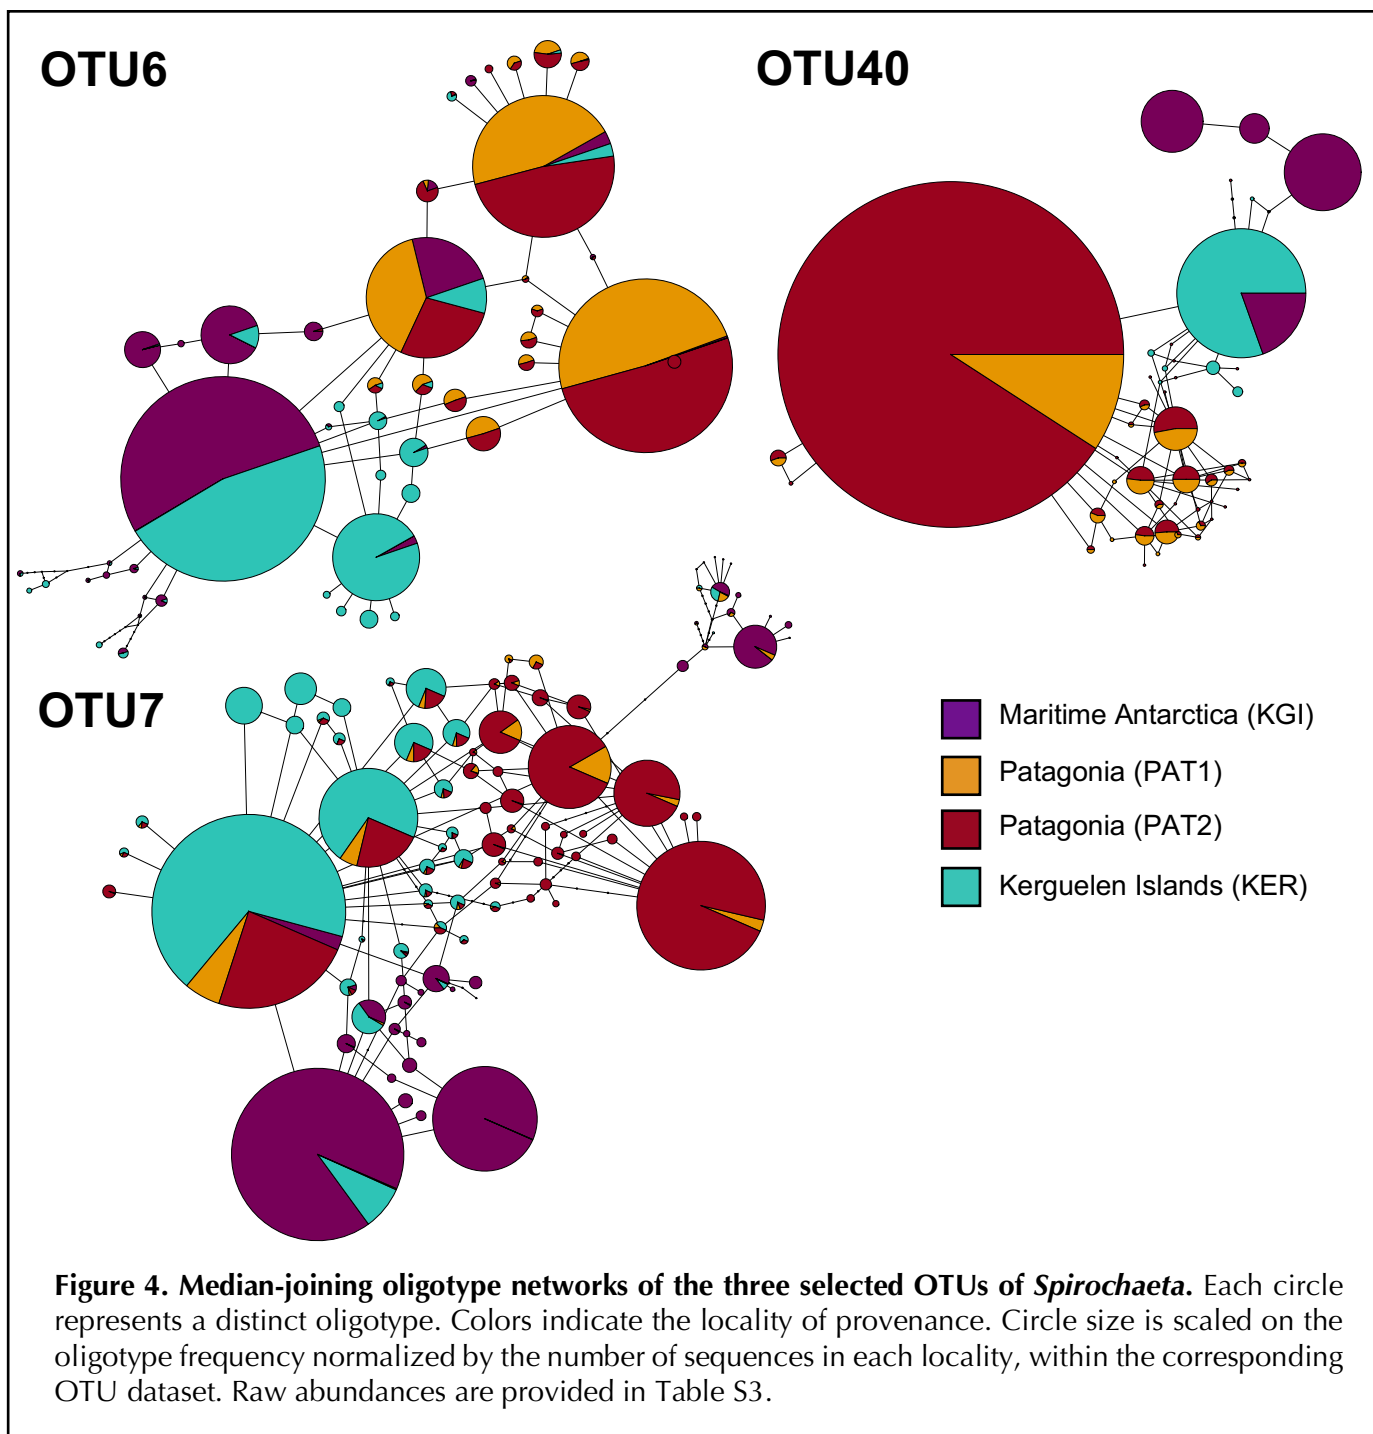

361 For OTU40, we recorded a predominant group of oligotypes specific to the Patagonian sites  
362 representing 65% of the oligotypes identified within the OTU40 (Additional file 4, Figure 4). A  
363 clear separation was observed in the oligotype network between the KGI/KER and PAT1/PAT2  
364 localities (Figure 4), with only 4 shared oligotypes (~8%) (Table S3). In maritime Antarctica (KGI),

365 three of the four oligotypes were private, whereas the dominant one from Kerguelen Islands (KER)  
 366 was shared with maritime Antarctica (KGI) (~8%) (Figure 4, Additional file 4).

367 **Gene flow under a migration–drift equilibrium model**

368 All the analyzed OTUs showed high genetic similarities between the analyzed Patagonian  
 369 populations (PAT1 and PAT2). Gene flow analyses identified a bidirectional pattern from PAT2  
 370 to PAT1 (effective number of migrants per generation,  $N_m > 4$ ) and from PAT1 to PAT2 ( $N_m >$   
 371 14) (Table 4).

**Table 4. Effective numbers of migrants per generation ( $N_m$ ) among *Spirochaeta* populations of the OTU6, OTU7 and OTU40.**

| OTU   | From | $\theta \pm se$    | To   | $N_m \pm se$                        |
|-------|------|--------------------|------|-------------------------------------|
| OTU6  | KGI  | $0.003 \pm 0.0003$ | KER  | <b><math>9.81 \pm 3.14</math></b>   |
|       |      |                    | PAT1 | $0.12 \pm 0.06$                     |
|       |      |                    | PAT2 | $0.14 \pm 0.09$                     |
|       | KER  | $0.004 \pm 0.0004$ | KGI  | <b><math>2.63 \pm 1.19</math></b>   |
|       |      |                    | PAT1 | $0.12 \pm 0.05$                     |
|       |      |                    | PAT2 | $0.07 \pm 0.05$                     |
|       | PAT1 | $0.003 \pm 0.0004$ | KGI  | $0.14 \pm 0.05$                     |
|       |      |                    | KER  | <b><math>0.43 \pm 0.15</math></b>   |
|       |      |                    | PAT2 | <b><math>24.99 \pm 7.10</math></b>  |
|       | PAT2 | $0.005 \pm 0.0005$ | KGI  | $0.20 \pm 0.07$                     |
|       |      |                    | KER  | <b><math>0.27 \pm 0.16</math></b>   |
|       |      |                    | PAT1 | <b><math>14.57 \pm 4.93</math></b>  |
| OTU7  | KGI  | $0.002 \pm 0.0003$ | KER  | <b><math>1.39 \pm 0.60</math></b>   |
|       |      |                    | PAT1 | <b><math>0.64 \pm 0.23</math></b>   |
|       |      |                    | PAT2 | $0.03 \pm 0.02$                     |
|       | KER  | $0.006 \pm 0.0006$ | KGI  | <b><math>0.42 \pm 0.13</math></b>   |
|       |      |                    | PAT1 | <b><math>24.41 \pm 8.23</math></b>  |
|       |      |                    | PAT2 | <b><math>2.00 \pm 0.54</math></b>   |
|       | PAT1 | $0.015 \pm 0.0029$ | KGI  | $0.16 \pm 0.06$                     |
|       |      |                    | KER  | <b><math>0.41 \pm 0.16</math></b>   |
|       |      |                    | PAT2 | <b><math>4.69 \pm 1.82</math></b>   |
|       | PAT2 | $0.004 \pm 0.0005$ | KGI  | $0.05 \pm 0.03$                     |
|       |      |                    | KER  | $0.13 \pm 0.09$                     |
|       |      |                    | PAT1 | <b><math>19.95 \pm 9.57</math></b>  |
| OTU40 | KGI  | $0.002 \pm 0.0002$ | KER  | $0.09 \pm 0.04$                     |
|       |      |                    | PAT1 | $0.01 \pm 0.01$                     |
|       |      |                    | PAT2 | $0.02 \pm 0.02$                     |
|       | KER  | $0.001 \pm 0.0002$ | KGI  | <b><math>0.87 \pm 0.21</math></b>   |
|       |      |                    | PAT1 | $0.02 \pm 0.02$                     |
|       |      |                    | PAT2 | $0.02 \pm 0.02$                     |
|       | PAT1 | $0.005 \pm 0.0008$ | KGI  | $0.01 \pm 0.01$                     |
|       |      |                    | KER  | $0.03 \pm 0.02$                     |
|       |      |                    | PAT2 | <b><math>28.65 \pm 10.15</math></b> |
|       | PAT2 | $0.005 \pm 0.0008$ | KGI  | $0.00 \pm 0.00$                     |
|       |      |                    | KER  | $0.06 \pm 0.02$                     |
|       |      |                    | PAT1 | <b><math>15.94 \pm 10.48</math></b> |

Only gene flows with  $N_m$  values  $> 0.25$  are considered as significant. Mean and standard error values were calculated from the 10 runs performed for each OTU.

372 The connectivity between the Patagonian and maritime Antarctic localities showed relatively low  
 373 values of Nm, ranging from 0.001 (OTU40, from PAT2 to KGI) to 0.6 (OTU7, from KGI to PAT2)  
 374 (Table 4). The OTU6 and OTU7 were both characterized by a substantial gene flow between  
 375 maritime Antarctica and Kerguelen Islands that was stronger in the direction KGI to KER (OTU6,  
 376 Nm ~ 9.8 and OTU7, Nm ~ 1.4) than in the direction KER to KGI (OTU6, Nm ~ 2.6 and OTU7,  
 377 Nm ~ 0.4) (Table 4). Contrarily, an unidirectional and low gene flow from KER to KGI (Nm ~ 0.9)  
 378 was recorded for the OTU40 (Table 4). Finally, the connectivity between Patagonian (PAT1 and  
 379 PAT2) and Kerguelen Islands (KER) localities was illustrated by three distinct patterns; a low-  
 380 intensity flow (Nm < 0.5) predominant in the direction PAT1/PAT2 to KER for the OTU6, a  
 381 substantial flow (Nm > 2) predominant in the direction KER to PAT1/PAT2 for the OTU7, and an  
 382 absence of connectivity (Nm < 0.03) in the case of the OTU40 (Table 4).

383 **Contribution of contemporary selection versus historical processes in shaping the *Spirochaeta***  
 384 **microdiversity**

385 For each of the three selected *Spirochaeta* OTUs, neutral ecological processes were essential in  
 386 shaping the population composition turnover in *Abatus* gut membrane. According to the  
 387 quantitative parsing of ecological processes, the composition of *Spirochaeta* population was  
 388 mostly driven by ecological drift, ranging from 50% (OTU40) to 74% (OTU6) of turnover,  
 389 followed by dispersal limitation, ranging from 12% (OTU6) to 20% (OTU40) of turnover, and  
 390 homogenizing selection, ranging from 9% (OTU6) to 19% (OTU40) of turnover (Table 5).

**Table 5. Quantitative parsing of ecological processes driving populations turnover within *Spirochaeta* OTUs.**

| <i>Spirochaeta</i> OTU | Ecological processes contributions |                            |                      |                          |                        |
|------------------------|------------------------------------|----------------------------|----------------------|--------------------------|------------------------|
|                        | Homogeneous selection (%)          | Homogenizing dispersal (%) | Ecological drift (%) | Dispersal limitation (%) | Variable selection (%) |
| OTU6                   | 2.7                                | 8.8                        | 74.0                 | 12.1                     | 2.3                    |
| OTU7                   | 0.4                                | 10.3                       | 63.7                 | 17.6                     | 8.0                    |
| OTU40                  | 0.3                                | 19.4                       | 49.6                 | 21.7                     | 9.1                    |

According to the Stegen et al. (2013) approach, percentage refers to the percentage of pairs of communities that appear to be driven by either homogeneous selection, homogenizing dispersal, ecological drift, dispersal limitation or variable selection.

391 Overall, deterministic processes (*i.e.* homogeneous and variable selection) did not account for  
392 more than 10% of the populations' turnover.

393 The MMRR approach was used to disentangle the relative effect of geographic distance  
394 environmental abiotic differences on the *Spirochaeta* oligotype compositions between samples.

395 The geographic distance matrix was linearly correlated to the abundance-based similarity matrix  
396 of *Spirochaeta* population composition for OTU7 and OTU40, explaining about 31% and 67%

397 of the observed variation, respectively (Table 6).

**Table 6. Multiple Matrix Regression with Randomization (MMRR) to quantify the relative effects of isolation by distance (IBD) and isolation by environment (IBE) on oligotypes assemblage within *Spirochaeta* OTUs.**

| <i>Spirochaeta</i> OTU | Model | Coefficient | t statistic | t p-value | F statistic | F p-value | R <sup>2</sup> |
|------------------------|-------|-------------|-------------|-----------|-------------|-----------|----------------|
| OTU6                   | IBE   | 0.037       | 17.82       | <0.001    | 187.32      | <0.001    | 0.208          |
|                        | IBD   | -0.158      | -2.59       | 0.078     | NA          | NA        | NA             |
| OTU7                   | IBE   | 0.020       | 12.10       | <0.001    | 162.43      | <0.001    | 0.165          |
|                        | IBD   | 0.309       | 6.11        | <0.001    | NA          | NA        | NA             |
| OTU40                  | IBE   | 0.022       | 6.45        | <0.001    | 102.08      | <0.001    | 0.235          |
|                        | IBD   | 0.667       | 7.97        | <0.001    | NA          | NA        | NA             |

The first statistical test (t) individually estimates the effect of the environmental distance and the geographic distance matrices, whereas the second one (F) evaluates the global fit of the model considering both distance matrices. *p*-values are considered as significant < 0.05.

398 In contrast, the geographic distance did not significantly impact *Spirochaeta* oligotype  
399 composition for OTU6 (Table 6). Whatever the OTU considered, the environment distance had  
400 a significant but slight contribution (< 4% of the observed variation) to the *Spirochaeta* population  
401 composition (Table 6), and the global R<sup>2</sup> of the model (environmental and geographic distance)  
402 did not exceed 24%.

### 403 Discussion

404 In this study, we coupled 16S rRNA metabarcoding and oligotyping algorithm to reveal the  
405 microdiversity within three bacterial OTUs affiliated to the *Spirochaeta* genus, and co-distributed  
406 across Patagonia, Kerguelen Islands, and maritime Antarctic provinces of the Southern Ocean.  
407 Through this innovative approach, we identified numerous oligotypes within each of the

408 *Spirochaeta* OTUs. These oligotypes, corresponding to *Spirochaeta* sub-taxa, were characterized  
409 by contrasting geographic distribution and high levels of 16S rRNA gene similarity (> 97%).  
410 Taking advantage of the populational taxonomic resolution provided by the oligotype definition,  
411 we depicted the *Spirochaeta* biogeographic patterns across the analyzed provinces in the SO,  
412 using various tools adapted from population genetics classically applied in phylogeographic  
413 study of macroorganisms' models. Despite its low substitution rate (approximately 1% in 50  
414 million years [85]), our study demonstrates that the 16s rRNA gene still has its advantage in  
415 effectiveness and efficiency since it offers the best compromise between an informative genetic  
416 signal, and robust screening of global microbial diversity at intra-OTU level, in a wide range of  
417 barely unknown habitats [17].

418 Unlike the studies with macroorganisms, which are usually more demanding in terms of  
419 individual sampling effort, we benefit here from the high sequencing depth provided by the  
420 metabarcoding of a low-diversity habitat (*i.e.* the *Abatus* gut tissue). This allows a robust coverage  
421 of the *Spirochaeta* diversity (up to 180,000 sequences per OTU), and thus high precision of the  
422 oligotypes frequencies. Our methodology echoes the "metaphylogeographic" approach recently  
423 proposed by Turon *et al.* [86] to investigate eukaryotic intraspecies diversity through COI  
424 (cytochrome c oxidase subunit I) gene amplicon-sequencing and an oligotyping-like cleaning  
425 protocol of the reads based on entropy variation. We propose to expand this concept of  
426 "metaphylogeography" to the prokaryotes since our method permits phylogeographic inferences  
427 of uncultured microbes from a wide range of habitats.

428 The  $\beta$ -diversity analysis performed at the *Spirochaeta* genus level revealed that each of the three  
429 geographic provinces might host specific *Spirochaeta* OTUs representing distinct phylogenetic  
430 lineages. We also reported a non-random distribution trend with contrasting patterns of  
431 *Spirochaeta* OTU abundances across the localities. Nevertheless, about half of the *Spirochaeta*  
432 OTUs exhibited a broad distribution encompassing Patagonia, maritime Antarctica, and the  
433 Kerguelen Islands located more than 7,000 kilometers to the east. This result suggests that despite



434 being mostly detected in *Abatus* gut, and to a lesser extent in marine benthic sediments, some  
435 *Spirochaeta* representatives would disperse through the SO currents. Concordantly, previous  
436 campaigns of high-throughput sequencing of the ocean water column have consistently reported  
437 the presence of free-living *Spirochaeta* OTUs in surface to mesopelagic water, away from the  
438 coastlines [87].

439 For each of the three assessed OTUs, the *Spirochaeta* populations were expected to be  
440 remarkably homogeneous between the two Patagonian sites due to the geographic vicinity and  
441 the absence of an evident oceanographic barrier. Indeed, most of the *Spirochaeta* oligotypes were  
442 shared between these two localities that displayed the lowest genetic and phylogeographic  
443 structure for each of the three OTUs. High levels of gene flow, illustrated by a high effective  
444 number of migrants per generation ( $N_m$ ), were also recorded between the two Patagonian  
445 localities, in accordance with the homogeneity of their oligotype compositions. Similarly, low or  
446 absent differentiation patterns along the Atlantic coast of Patagonia were previously reported for  
447 marine Patagonian macroorganisms, including notothenioid fishes [88] scorched mussels [89],  
448 and pulmonate gastropods [90]presumably due to their high dispersal potential and the  
449 ecological continuum of the sampled localities that may conform a same biogeographic province  
450 connected through the equator-ward Falkland current [91, 92]. Further phylogeographic studies  
451 focusing on microbial taxa of additional sampling sites from Atlantic Patagonia should confirm  
452 the microbial biogeographic consistency of this province.

453 Between Patagonian and maritime Antarctic provinces, *Spirochaeta* populations exhibited strong  
454 genetic and phylogeographic structure, as illustrated by the high  $F_{ST}$  and  $\phi_{ST}$  values and the  
455 relatively low number of shared oligotypes. Additionally, low levels of gene flow were estimated  
456 between these two provinces (*i.e.* effective numbers of migrants per generation  $N_m < 1$ ). These  
457 results corroborate our hypothesis that the APF hinders individual dispersion and genetic  
458 homogeneity among bacterial populations and suggest that the geographically structured  
459 *Spirochaeta* populations from these two provinces are genetically diverging over time [93, 94].

460 Previous studies focusing on diverse macroorganisms taxonomic groups of the SO have  
461 evidenced the critical role of the APF on biogeographic patterns, as an open-ocean barrier  
462 inducing a genetic break between South America and Antarctica (e.g. ribbon worms, [95]; brittle  
463 stars, [96]; notothenioid fishes, [25, 97]; limpets [26, 29, 98]; sea urchins [24]). Regarding the  
464 microbial distribution patterns, significant  $\beta$ -diversity differences between prokaryotes assembly  
465 from both sides of the APF have been reported in the past, but most of the studies focused on  
466 global community in the water column, at high taxonomic resolution (summarized in Flaviani et  
467 al. [20]). Here, we extend this discontinuity in bacterial diversity to a finer taxonomic resolution  
468 (*i.e.* intra-OTU), revealing province-restricted oligotypes and strong genetic and phylogeographic  
469 structure between Patagonian and maritime Antarctic *Spirochaeta* populations.

470 Contrarily, and despite the substantial geographic distance separating the sub-Antarctic  
471 Kerguelen Islands and the Patagonian and Antarctic sites (> 6,500 kilometers), population genetic  
472 analyses suggest the existence of some level of connectivity between Kerguelen and the other  
473 sites. These findings support a potential dispersion of *Spirochaeta* taxa from Patagonia and  
474 maritime Antarctica to the Kerguelen Islands, and contrariwise, from the Kerguelen Islands to  
475 Patagonia and maritime Antarctica. As evidenced by the numerous shared oligotypes, such  
476 connectivity would maintain a sufficient gene flow among these provinces to partially counteract  
477 the genetic divergence driven by selection, mutation, and genetic drift, inducing oligotypes  
478 mixing, and limiting the spatial differentiation of oligotypes assembly [1] [99]. Moreover, we  
479 suggest that this gene flow is not bidirectional, but governed by exclusively eastward oriented  
480 dispersion routes (Figure 5), following the major and constant flow of the ACC [100]. Under this  
481 scenario, *Spirochaeta* individuals from Kerguelen Islands may seed towards Patagonia following  
482 the ACC eastward flow around Antarctica. Such ACC-mediated connectivity among sub-  
483 Antarctic provinces (Patagonia and Kerguelen Islands) is well known in a wide range of benthic  
484 macroorganisms populations, such as buoyant kelps *Durvillaea antarctica* [38] and *Macrocystis*  
485 *pyrifera* [101], and several kelp-associated macroinvertebrates [32, 34, 35, 100, 102].

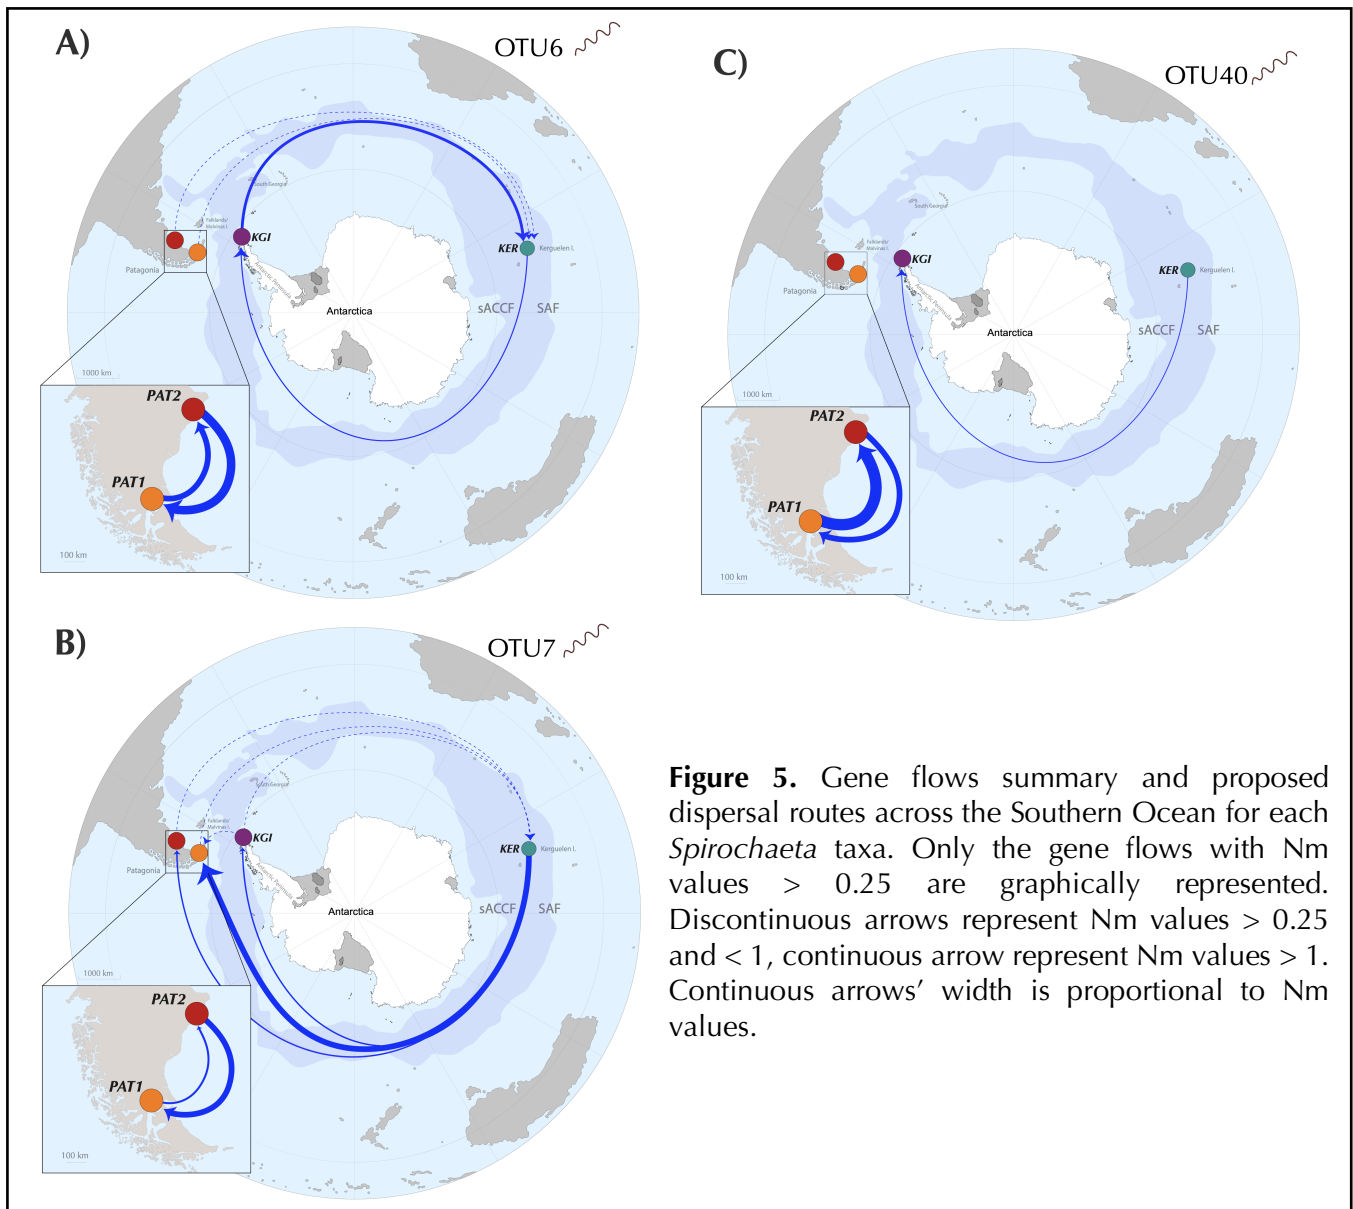

**Figure 5.** Gene flows summary and proposed dispersal routes across the Southern Ocean for each *Spirochaeta* taxa. Only the gene flows with Nm values > 0.25 are graphically represented. Discontinuous arrows represent Nm values > 0.25 and < 1, continuous arrow represent Nm values > 1. Continuous arrows' width is proportional to Nm values.

486 Occasionally, *Spirochaeta* individuals from Kerguelen Islands may also be able to reach the  
487 maritime Antarctic province. Such pattern has been recently reported for the southern bull kelp  
488 *D. antarctica*, a typical sub-Antarctic macroalgae, which is transported by rafting to as far as the  
489 West Antarctic Peninsula coasts, pushed by the circumpolar flow of the ACC or by storms leading  
490 to the occasional crossing of the APF [103].

491 Several studies have provided evidence of a high dispersal capacity of marine bacteria by  
492 comparing community composition mostly at high taxonomic resolution (e.g. class, genus, or  
493 OTU) among various water masses and oceanic regions [104-107]. Particularly, the most

494 abundant marine bacteria are supposed to migrate between adjacent regions through passive  
495 transport [104]. However, this is the first time that it is evidenced in bacterial populations through  
496 the microdiversity resolution, being solely suggested so far at the community level [20]. An  
497 innovative conceptual framework called "Microbial Conveyor Belt" (MCB) has been proposed by  
498 Mestre & Höfer [108], to emphasize that the marine microorganisms' dispersion would not  
499 merely rely on passive and stochastic dispersal, but instead on the adaptation of life-history traits  
500 (e.g. dormancy stage). These traits would allow microorganisms to successfully and recurrently  
501 disperse in unfavorable habitats through specific dispersion avenues [109]. Here, we provided  
502 empiric results from *Spirochaeta* population based on genetic data supporting a partial MCB in  
503 the SO driven by the ACC. Unfortunately, details about the benthic *Spirochaeta* taxa's ecology  
504 are scarce, with a single isolated strain from subseafloor sediment [110]. Thus, the life-history  
505 traits of *Spirochaeta*, as the sporulation capacity, remain to be investigated to further understand  
506 its distribution pattern in the SO. Nevertheless, in order to disperse, we propose that *Spirochaeta*  
507 individuals (enriched in the digestive tract) could be released from the host gut towards the  
508 surrounding benthic sediments through fecal pellets. Such enrichment of the digesta with taxa  
509 from the host microbiota, as well as the presence of *Spirochaeta* within the fecal material, have  
510 been demonstrated in the sea urchin species *Lytechinus variegatus* [111]. The released  
511 *Spirochaeta* individuals may be resuspended in the water column through the action of one or  
512 several processes such as upwelling, bioturbation by the benthic deposit-feeders, or water  
513 column mixing during winter [108, 112, 113]. Once in the water column, these *Spirochaeta*  
514 individuals may disperse over large geographic scales, transported through oceanographic  
515 features (e.g. currents, punctual meteorological events) [108]. The attachment to suspended  
516 particulate matter, either biotic (e.g. hitchhiking on zooplankton [114] and seaweed [115]) or  
517 abiotic (e.g. microplastics [116], known to have a long-distance dispersion potential), may also  
518 contribute to the bacterial spreading in the oceans [107, 108].

519 The marine prokaryote communities are usually considered widely dispersed and mainly shaped  
520 by contemporary ecological processes such as environmental filtering [106, 117]. By applying  
521 the ecological framework developed by Stegen et al. [71] to oligotypes data, we found contrarily  
522 that ecological drift was the predominant stochastic mechanism shaping intra-populations  
523 turnover within *Spirochaeta* taxa across the SO. Our previous study of the *Abatus* gut microbiota  
524 showed that non-neutral processes drove the bacterial community at the OTU level in the host  
525 gut tissue [54]. While deterministic processes are usually prevalent in structuring microbial  
526 communities' assembly at a higher taxonomic resolution [18, 79, 118, 119], the stochastic  
527 mechanisms tend to have a more significant contribution at finer taxonomic scales [105], since  
528 niche overlapping and functional redundancy enhance the susceptibility of populations to drift  
529 [120]. Thus, the biogeographic structure observed within *Spirochaeta* populations might result  
530 from stochastic birth, death, disturbance, emigration, and immigration events rather than  
531 oligotype-sorting through the biotic and abiotic environmental variations [1, 121, 122].  
532 Consistently, the MMRR analysis revealed that the Isolation-by-Environment (IBE) model might  
533 account for a low percentage of the *Spirochaeta* oligotypes turnover. Altogether, these results  
534 validate the strategy applied in our study, that is, to focus on specialist bacterial taxa hosted in  
535 sibling sea urchin species with the same habitat preferences, in order to homogenize the  
536 environment, to reduce the diversity, to soften the deterministic selection driven by  
537 environmental variations and to maximize the detection of neutral micro-evolutive processes  
538 associated with biogeography [123].

539 By analogy with the genetic drift, whereby changes in gene frequencies occur solely by chance  
540 in a population [76], our result suggests that the microdiversity observed within the *Spirochaeta*  
541 taxa would be mostly generated by genetic drift without any adaptive implications. An earlier  
542 study reported that microdiversity observed in the 16S rRNA gene of marine coastal *Vibrio*  
543 *splendidus* isolates was ecologically neutral [124]. Nevertheless, we cannot discard that, while  
544 the microdiversity within the V4-V5 of 16S rRNA gene-targeted here is likely to be acquired

545 through neutral processes [125], it may also be associated with substantial modifications in  
546 niche-defining traits and functional attributes specific of the *Spirochaeta* strains, driven by  
547 deterministic processes, in order to cope with local conditions [17, 126]. Further studies will  
548 need to focus on other loci (e.g. functional genes), potentially under selection, as they are  
549 expected to display a higher degree of differentiation among populations and to provide an  
550 insight into the ecology of the *Spirochaeta* sub-taxa [127]. Furthermore, notwithstanding the  
551 consistency of the global phylogeographic and connectivity patterns depicted across the three  
552 tested OTUs, we also reported some differences according to the taxa considered, which might  
553 be related to different ecotypes with distinct ecological niches or different dispersal capacity. For  
554 instance, various marine bacterial taxa, such as the cyanobacteria *Synechococcus* or the *Vibrio*  
555 populations, demonstrate fine-tuning of their physiology by accumulating microdiversity in  
556 functional genes through duplication events, SNPs, and allelic variants [128, 129]. Alternatively,  
557 these differences may also be related to the *Spirochaeta* OTU abundance, since the more  
558 relatively abundant the *Spirochaeta* populations were (*i.e.* higher number of sequences retrieved  
559 from the gut tissue through the metabarcoding approach), the more they tend to exhibit  
560 cosmopolitan oligotypes (*i.e.* detected across each of the four localities). It is not unreasonable  
561 to infer that a larger population may have more chance to migrate and successfully reach a  
562 suitable habitat, while small-size populations may be more likely diluted along the dispersal route  
563 with no/too few dispersive particles to establish in the new habitat [104].

564 The diversity units defined by 16S rRNA gene sequences are generally considered as insensitive  
565 to diversification resulting from dispersal limitation [10]. Contrastingly, we reported that the  
566 dispersal limitation was the second most crucial ecological factor driving the turnover of  
567 *Spirochaeta* oligotypes, and by extension, their genetic divergence. Dispersal limitation is  
568 classically considered as a historical factor since current oligotypes assemblage results from past  
569 dispersal limitations [1]. Our result indicates that the potentially suitable habitats are too distant  
570 [130], or inaccessible due to the existence of oceanic currents [104, 131], hence limiting the

571 homogenization of *Spirochaeta* oligotypes' frequencies across populations and allowing the  
572 neutral genetic divergence of genomic regions overtime via genetic drift [10, 132]. Note that our  
573 results obtained from distinct methodologies (*i.e.* the genetic differentiation and phylogeographic  
574 structure, the contribution of dispersal limitation from Stegen *et al.* framework [71], and the  
575 contribution of the geographic distance (IBD) from the MMRR analysis) were highly consistent  
576 with each other, and across the three selected *Spirochaeta* OTUs. For instance, the OTU40 that  
577 harbored the overall highest value of genetic divergence was also characterized by the highest  
578 estimated contribution of geographic distance and dispersal limitation, thus supporting the  
579 interrelation between genetic divergence and oligotypes population turnover, and the overall  
580 consistency of the approach implemented.

## 581 **Conclusion**

582 Our study highlights the application of V4-V5 16S rRNA gene metabarcoding and oligotyping  
583 approach as rapid, robust, and resolute enough to unravel marine bacterial phylogeographic  
584 patterns and detect genetic connectivity among the SO provinces. Taken together, the three  
585 *Spirochaeta* OTUs analyzed evidence three consistent phylogeographic patterns, classically  
586 observed in the studies involving benthic macroinvertebrates across the SO: (i) a high  
587 populational and genetic homogeneity within the Patagonia province, (ii) a strong barrier to  
588 dispersal between Patagonia and maritime Antarctica due to the APF, resulting in a high  
589 differentiation of *Spirochaeta* populations, and (iii) the existence of connectivity between sub-  
590 Antarctic provinces of the Kerguelen Islands and Patagonia, and from Kerguelen Islands to  
591 maritime Antarctic, due to the ACC-mediated connectivity. Nevertheless, as connected as these  
592 provinces are, the gene flow does not seem to be strong enough to prevent the ongoing  
593 intraspecific differentiation process of the *Spirochaeta* taxa. The microdiversity of *Spirochaeta*,  
594 underlying these biogeographic patterns, is essentially driven by historical processes, such as  
595 ecological and genetic drift, and dispersal limitation related to the SO's oceanographic features.



596 In the future, extending this framework to other localities and taxonomic groups will contribute  
597 to the comprehensive understanding of the Southern Ocean microbiota.

## 598 **Declaration**

### 599 **Ethics approval and consent to participate**

600 Not applicable

### 601 **Consent for publication**

602 Not applicable

### 603 **Availability of data and materials**

604 The datasets generated for this study can be found at the National Centre for Biotechnology  
605 Information (NCBI) repository, under the following accession numbers: PRJNA658980,  
606 PRJNA590493 and PRJNA659050, corresponding to the datasets of *Abatus cordatus* from  
607 Kerguelen Archipelago, *Abatus agassizii* from West Antarctic Peninsula and *Abatus cavernosus*  
608 from South America, respectively.

### 609 **Competing interests**

610 The authors declare that they have no competing interests

### 611 **Funding**

612 This work was financially supported by the project ANID/CONICYT PIA ACT 172065.  
613 Additionally, this research was supported by the post-doctoral projects ANID/CONICYT  
614 FONDECYT 3200036 (GS) and 3190482 (NS).

### 615 **Authors' contributions**

616 EP, JO and LC designed the study. EP and JO organized the sampling missions. EP, JO, LC and  
617 GS collected samples. GS extracted the DNA, organized sequencing and managed data mining  
618 and analyses. NS contributed to the gene-flow and the MMRR analyses and designed the

619 illustrative maps. GS, JO, NS, CGW and EP interpreted the results. GS wrote the manuscript. All  
620 authors contributed substantially to manuscript revisions. All authors read and approved the final  
621 manuscript.

## 622 **Acknowledgements**

623 We thank Dr Peter Beerli and Dr Franz-Sebastian Krahl for their technical supports. We also thank  
624 Jonathan Flores for providing *Abatus* samples from Argentinian Patagonia, and Dr Karin Gérard  
625 for managing the sampling logistic in Chilean Patagonia. We recognize the Chilean Antarctic  
626 Institute (INACH) for the logistic support during the Chilean Antarctic Expeditions (ECA 55 and  
627 56).

628

## 629 **Bibliography**

- 630 1. Martiny JB, Bohannan BJ, Brown JH, Colwell RK, Fuhrman JA, Green JL, Horner-Devine  
631 MC, Kane M, Krumins JA, Kuske CR, et al: **Microbial biogeography: putting**  
632 **microorganisms on the map.** *Nat Rev Microbiol* 2006, **4**:102-112.
- 633 2. Nemergut DR, Costello EK, Hamady M, Lozupone C, Jiang L, Schmidt SK, Fierer N,  
634 Townsend AR, Cleveland CC, Stanish L, Knight R: **Global patterns in the biogeography**  
635 **of bacterial taxa.** *Environ Microbiol* 2011, **13**:135-144.
- 636 3. Wilkins D, Lauro FM, Williams TJ, Demaere MZ, Brown MV, Hoffman JM, Andrews-  
637 Pfannkoch C, McQuaid JB, Riddle MJ, Rintoul SR, Cavicchioli R: **Biogeographic**  
638 **partitioning of Southern Ocean microorganisms revealed by metagenomics.** *Environ*  
639 *Microbiol* 2013, **15**:1318-1333.
- 640 4. Karimi B, Terrat S, Dequiedt S, Saby NP, Horrigue W, Lelièvre M, Nowak V, Jolivet C,  
641 Arrouays D, Wincker P: **Biogeography of soil bacteria and archaea across France.**  
642 *Science advances* 2018, **4**:eaat1808.
- 643 5. Bahl J, Lau MC, Smith GJ, Vijaykrishna D, Cary SC, Lacap DC, Lee CK, Papke RT, Warren-  
644 Rhodes KA, Wong FK, et al: **Ancient origins determine global biogeography of hot and**  
645 **cold desert cyanobacteria.** *Nat Commun* 2011, **2**:163.
- 646 6. Stegen JC, Lin X, Konopka AE, Fredrickson JK: **Stochastic and deterministic assembly**  
647 **processes in subsurface microbial communities.** *ISME J* 2012, **6**:1653-1664.
- 648 7. Van der Gast CJ: **Microbial biogeography: the end of the ubiquitous dispersal**  
649 **hypothesis?** *Environ Microbiol* 2015, **17**:544-546.
- 650 8. Gilbert JA, Steele JA, Caporaso JG, Steinbrück L, Reeder J, Temperton B, Huse S,  
651 McHardy AC, Knight R, Joint I, et al: **Defining seasonal marine microbial community**  
652 **dynamics.** *ISME J* 2012, **6**:298-308.
- 653 9. Fuhrman JA, Hewson I, Schwalbach MS, Steele JA, Brown MV, Naeem S: **Annually**  
654 **reoccurring bacterial communities are predictable from ocean conditions.** *Proc Natl*  
655 *Acad Sci U S A* 2006, **103**:13104-13109.

- 656 10. Hanson CA, Fuhrman JA, Horner-Devine MC, Martiny JB: **Beyond biogeographic**  
657 **patterns: processes shaping the microbial landscape.** *Nat Rev Microbiol* 2012, **10**:497-  
658 506.
- 659 11. Hanson CA, Müller AL, Loy A, Dona C, Appel R, Jørgensen BB, Hubert CR: **Historical**  
660 **factors associated with past environments influence the biogeography of**  
661 **thermophilic endospores in Arctic marine sediments.** *Frontiers in microbiology* 2019,  
662 **10**.
- 663 12. Papke RT, Ramsing NB, Bateson MM, Ward DM: **Geographical isolation in hot spring**  
664 **cyanobacteria.** *Environmental Microbiology* 2003, **5**:650-659.
- 665 13. Whitaker RJ, Grogan DW, Taylor JW: **Geographic barriers isolate endemic populations**  
666 **of hyperthermophilic archaea.** *Science* 2003, **301**:976-978.
- 667 14. Almasia R, Carú M, Handford M, Orlando J: **Environmental conditions shape soil**  
668 **bacterial community structure in a fragmented landscape.** *Soil Biology and*  
669 *Biochemistry* 2016, **103**:39-45.
- 670 15. Wu L, Ning D, Zhang B, Li Y, Zhang P, Shan X, Zhang Q, Brown M, Li Z, Van Nostrand JD,  
671 et al: **Global diversity and biogeography of bacterial communities in wastewater**  
672 **treatment plants.** *Nature Microbiology* 2019.
- 673 16. Bay SK, McGeoch MA, Gillor O, Wieler N, Palmer DJ, Baker DJ, Chown SL, Greening C,  
674 Gilbert JA: **Soil bacterial communities exhibit strong biogeographic patterns at fine**  
675 **taxonomic resolution.** *mSystems* 2020, **5**.
- 676 17. Chase AB, Martiny JB: **The importance of resolving biogeographic patterns of**  
677 **microbial microdiversity.** *Microbiology Australia* 2018, **39**:5-8.
- 678 18. Larkin AA, Martiny AC: **Microdiversity shapes the traits, niche space, and**  
679 **biogeography of microbial taxa.** *Environmental microbiology reports* 2017, **9**:55-70.
- 680 19. Fenchel T, Finlay BJ: **The ubiquity of small species: patterns of local and global**  
681 **diversity.** *Bioscience* 2004, **54**:777-784.
- 682 20. Flaviani F, Schroeder DC, Leuret K, Balestreri C, Highfield AC, Schroeder JL, Thorpe SE,  
683 Moore K, Paszkiewicz K, Pfaff MC, Rybicki EP: **Distinct oceanic microbiomes from**  
684 **viruses to protists located near the Antarctic Circumpolar Current.** *Front Microbiol*  
685 2018, **9**:1474.
- 686 21. Gruber N, Landschützer P, Lovenduski NS: **The variable Southern Ocean carbon sink.**  
687 *Annual review of marine science* 2019, **11**:159-186.
- 688 22. Griffiths HJ: **Antarctic marine biodiversity—what do we know about the distribution**  
689 **of life in the Southern Ocean?** *PloS one* 2010, **5**:e11683.
- 690 23. Halanych KM, Mahon AR: **Challenging dogma concerning biogeographic patterns of**  
691 **Antarctica and the Southern Ocean.** *Annual Review of Ecology, Evolution, and*  
692 *Systematics* 2018, **49**:355-378.
- 693 24. Díaz A, Féral J-P, David B, Saucède T, Poulin E: **Evolutionary pathways among shallow**  
694 **and deep-sea echinoids of the genus *Sterechinus* in the Southern Ocean.** *Deep Sea*  
695 *Research Part II: Topical Studies in Oceanography* 2011, **58**:205-211.
- 696 25. Hüne M, González-Wevar C, Poulin E, Mansilla A, Fernández DA, Barrera-Oro E: **Low**  
697 **level of genetic divergence between *Harpagifer* fish species (Perciformes:**  
698 **Notothenoidei) suggests a Quaternary colonization of Patagonia from the Antarctic**  
699 **Peninsula.** *Polar Biology* 2015, **38**:607-617.
- 700 26. González-Wevar CA, Hüne M, Rosenfeld S, Nakano T, Saucède T, Spencer H, Poulin E:  
701 **Systematic revision of *Nacella* (Patellogastropoda: Nacellidae) based on a complete**

- 702 **phylogeny of the genus, with the description of a new species from the southern tip**  
703 **of South America.** *Zoological Journal of the Linnean Society* 2019, **186**:303-336.
- 704 27. Poulin E, González-Wevar C, Díaz A, Gérard K, Hüne M: **Divergence between Antarctic**  
705 **and South American marine invertebrates: What molecular biology tells us about**  
706 **Scotia Arc geodynamics and the intensification of the Antarctic Circumpolar Current.**  
707 *Global and Planetary Change* 2014, **123**:392-399.
- 708 28. Strugnell JM, Rogers AD, Prodöhl PA, Collins MA, Allcock AL: **The thermohaline**  
709 **expressway: the Southern Ocean as a centre of origin for deep-sea octopuses.**  
710 *Cladistics* 2008, **24**:853-860.
- 711 29. González-Wevar CA, Hüne M, Segovia NI, Nakano T, Spencer HG, Chown SL, Saucède  
712 T, Johnstone G, Mansilla A, Poulin E: **Following the Antarctic Circumpolar Current:**  
713 **patterns and processes in the biogeography of the limpet *Nacella* (Mollusca:**  
714 ***Patellogastropoda*) across the Southern Ocean.** *Journal of biogeography* 2017,  
715 **44**:861-874.
- 716 30. Koubbi P, De Broyer C, Griffiths H, Raymond B, D'Udekem d'Acoz C, Van de Putte A,  
717 Danis B, David B, Grant S, Gutt J: **Conclusions: Present and future of Southern Ocean**  
718 **biogeography.** 2014.
- 719 31. Waters JM: **Driven by the West Wind Drift? A synthesis of southern temperate**  
720 **marine biogeography, with new directions for dispersalism.** *Journal of Biogeography*  
721 2008, **35**:417-427.
- 722 32. González-Wevar CA, Segovia NI, Rosenfeld S, Ojeda J, Hüne M, Naretto J, Saucède T,  
723 Brickle P, Morley S, Féral JP: **Unexpected absence of island endemics: long-distance**  
724 **dispersal in higher latitude sub-Antarctic *Siphonaria* (Gastropoda: Euthyneura)**  
725 **species.** *Journal of biogeography* 2018, **45**:874-884.
- 726 33. Moon KL, Chown SL, Fraser CI: **Reconsidering connectivity in the sub-Antarctic.**  
727 *Biological Reviews* 2017, **92**:2164-2181.
- 728 34. Nikula R, Fraser C, Spencer H, Waters J: **Circumpolar dispersal by rafting in two**  
729 **subantarctic kelp-dwelling crustaceans.** *Marine Ecology Progress Series* 2010,  
730 **405**:221-230.
- 731 35. Cumming R, Nikula R, Spencer H, Waters J: **Transoceanic genetic similarities of kelp-**  
732 **associated sea slug populations: long-distance dispersal via rafting?** *Journal of*  
733 *Biogeography* 2014, **41**:2357-2370.
- 734 36. Gérard K, Bierne N, Borsa P, Chenuil A, Féral J-P: **Pleistocene separation of**  
735 **mitochondrial lineages of *Mytilus* spp. mussels from Northern and Southern**  
736 **Hemispheres and strong genetic differentiation among southern populations.**  
737 *Molecular Phylogenetics and Evolution* 2008, **49**:84-91.
- 738 37. Frugone MJ, López ME, Segovia NI, Cole TL, Lowther A, Pistorius P, Dantas GP, Petry  
739 MV, Bonadonna F, Trathan P: **More than the eye can see: Genomic insights into the**  
740 **drivers of genetic differentiation in Royal/Macaroni penguins across the Southern**  
741 **Ocean.** *Molecular phylogenetics and evolution* 2019, **139**:106563.
- 742 38. Fraser CI, Nikula R, Spencer HG, Waters JM: **Kelp genes reveal effects of subantarctic**  
743 **sea ice during the Last Glacial Maximum.** *Proceedings of the National Academy of*  
744 *Sciences* 2009, **106**:3249-3253.
- 745 39. De Broyer C, Koubbi P, Griffiths H, Raymond B, d' U, Van de Putte A, Danis B, David B,  
746 Grant S, Gutt J, et al: *Biogeographic Atlas of the Southern Ocean.* 2014.

- 747 40. Shade A, Dunn RR, Blowes SA, Keil P, Bohannan BJ, Herrmann M, Küsel K, Lennon JT,  
748 Sanders NJ, Storch D: **Macroecology to unite all life, large and small.** *Trends in ecology*  
749 *& evolution* 2018, **33**:731-744.
- 750 41. Murray AE, Grzymski JJ: **Diversity and genomics of Antarctic marine micro-organisms.**  
751 *Philos Trans R Soc Lond B Biol Sci* 2007, **362**:2259-2271.
- 752 42. Raes EJ, Bodrossy L, Van De Kamp J, Bissett A, Ostrowski M, Brown MV, Sow SL, Sloyan  
753 B, Waite AM: **Oceanographic boundaries constrain microbial diversity gradients in**  
754 **the South Pacific Ocean.** *Proceedings of the National Academy of Sciences* 2018,  
755 **115**:E8266-E8275.
- 756 43. Edgar RC, Flyvbjerg H: **Error filtering, pair assembly and error correction for next-**  
757 **generation sequencing reads.** *Bioinformatics* 2015, **31**:3476-3482.
- 758 44. Eren AM, Morrison HG, Lescault PJ, Reveillaud J, Vineis JH, Sogin ML: **Minimum**  
759 **entropy decomposition: unsupervised oligotyping for sensitive partitioning of high-**  
760 **throughput marker gene sequences.** *ISME J* 2015, **9**:968-979.
- 761 45. Buttigieg PL, Ramette A: **A guide to statistical analysis in microbial ecology: a**  
762 **community-focused, living review of multivariate data analyses.** *FEMS Microbiol Ecol*  
763 2014, **90**:543-550.
- 764 46. Lindström ES, Langenheder S: **Local and regional factors influencing bacterial**  
765 **community assembly.** *Environmental Microbiology Reports* 2012, **4**:1-9.
- 766 47. Szekely AJ, Berga M, Langenheder S: **Mechanisms determining the fate of dispersed**  
767 **bacterial communities in new environments.** *ISME J* 2013, **7**:61-71.
- 768 48. Langenheder S, Lindström ES: **Factors influencing aquatic and terrestrial bacterial**  
769 **community assembly.** *Environmental microbiology reports* 2019, **11**:306-315.
- 770 49. Astorga A, Oksanen J, Luoto M, Soininen J, Virtanen R, Muotka T: **Distance decay of**  
771 **similarity in freshwater communities: do macro-and microorganisms follow the**  
772 **same rules?** *Global Ecology and Biogeography* 2012, **21**:365-375.
- 773 50. Guillaumot C, Fabri-Ruiz S, Martin A, Eléaume M, Danis B, Féral JP, Saucède T: **Benthic**  
774 **species of the Kerguelen Plateau show contrasting distribution shifts in response to**  
775 **environmental changes.** *Ecol Evol* 2018, **8**:6210-6225.
- 776 51. Poulin E, Feral J-P: **Pattern of spatial distribution of a brood-protecting schizasterid**  
777 **echinoid, *Abatus cordatus*, endemic to the Kerguelen Islands.** *Mar Ecol Prog Ser* 1995,  
778 **118**:179-186.
- 779 52. David B, Choné T, Mooi R, De Ridder C: **Antarctic echinoidea. Synopses of the**  
780 **Antarctic benthos.** *Lichtenstein: ARG Gantner* 2005.
- 781 53. Díaz A, González-Wevar CA, Maturana CS, Palma AT, Poulin E, Gerard K: **Restricted**  
782 **geographic distribution and low genetic diversity of the brooding sea urchin *Abatus***  
783 ***agassizii* (Spatangoidea: Schizasteridae) in the South Shetland Islands: A bridgehead**  
784 **population before the spread to the northern Antarctic Peninsula?** *Rev Chil Hist Nat*  
785 2012, **85**:457-468.
- 786 54. Schwob G, Cabrol L, Poulin E, Orlando J: **Characterization of the gut microbiota of the**  
787 **Antarctic heart urchin (Spatangoida) *Abatus agassizii*.** *Frontiers in Microbiology* 2020,  
788 **11**.
- 789 55. Bowman JP, McCuaig RD: **Biodiversity, community structural shifts, and**  
790 **biogeography of prokaryotes within Antarctic continental shelf sediment.** *Appl*  
791 *Environ Microbiol* 2003, **69**:2463-2483.



- 792 56. Beiruti ZA, Bhatnagar S, Tegetmeyer HE, Geelhoed JS, Strous M, Ruff SE: **Transient**  
793 **exposure to oxygen or nitrate reveals ecophysiology of fermentative and sulfate-**  
794 **reducing benthic microbial populations.** *bioRxiv* 2017:146886.
- 795 57. Parada AE, Needham DM, Fuhrman JA: **Every base matters: assessing small subunit**  
796 **rRNA primers for marine microbiomes with mock communities, time series and**  
797 **global field samples.** *Environ Microbiol* 2016, **18**:1403-1414.
- 798 58. Bokulich NA, Subramanian S, Faith JJ, Gevers D, Gordon JI, Knight R, Mills DA, Caporaso  
799 JG: **Quality-filtering vastly improves diversity estimates from Illumina amplicon**  
800 **sequencing.** *Nat Methods* 2013, **10**:57-59.
- 801 59. Chessel D, Dufour A-B, Dray S: **Package 'ade4': Analysis of Ecological Data: Exploratory**  
802 **and Euclidean Methods in Environmental Sciences.** *R-package Version: 15-1* 2009.
- 803 60. Oksanen J, Blanchet FG, Kindt R, Legendre P, O'Hara R, Simpson GL, Solymos P, Stevens  
804 MHH, Wagner H: **Vegan: Community ecology package, 2011.** *R package version*  
805 *2011:1.17-18.*
- 806 61. Martinez Arbizu P: **pairwiseAdonis: Pairwise multilevel comparison using adonis.** *R*  
807 *package version* 2017, **1.**
- 808 62. Eren AM, Maignien L, Sul WJ, Murphy LG, Grim SL, Morrison HG, Sogin ML:  
809 **Oligotyping: Differentiating between closely related microbial taxa using 16S rRNA**  
810 **gene data.** *Methods Ecol Evol* 2013, **4.**
- 811 63. Hsieh T, Ma K, Chao A: **iNEXT: an R package for rarefaction and extrapolation of**  
812 **species diversity (Hill numbers).** *Methods in Ecology and Evolution* 2016, **7**:1451-1456.
- 813 64. Team RC: **R: A language and environment for statistical computing.** *R Foundation for*  
814 **Statistical Computing, Vienna, Austria, 2012.** ISBN 3-900051-07-0; 2012.
- 815 65. Paradis E: **pegas: an R package for population genetics with an integrated-modular**  
816 **approach.** *Bioinformatics* 2010, **26**:419-420.
- 817 66. Paradis E, Blomberg S, Bolker B, Brown J, Claude J, Cuong HS, Desper R, Didier G:  
818 **Package 'ape'.** *Analyses of phylogenetics and evolution, version* 2015, **2**:4-1.
- 819 67. Schneider S, Roessli D, Excoffier L: **Arlequin: a software for population genetics data**  
820 **analysis.** *User manual ver* 2000, **2**:2496-2497.
- 821 68. Hudson RR: **A new statistic for detecting genetic differentiation.** *Genetics* 2000,  
822 **155**:2011-2014.
- 823 69. Librado P, Rozas J: **DnaSP v5: a software for comprehensive analysis of DNA**  
824 **polymorphism data.** *Bioinformatics* 2009, **25**:1451-1452.
- 825 70. Leigh JW, Bryant D: **POPART: full-feature software for haplotype network**  
826 **construction.** *Methods in Ecology and Evolution* 2015, **6**:1110-1116.
- 827 71. Stegen JC, Lin X, Fredrickson JK, Chen X, Kennedy DW, Murray CJ, Rockhold ML,  
828 Konopka A: **Quantifying community assembly processes and identifying features that**  
829 **impose them.** *ISME J* 2013, **7**:2069-2079.
- 830 72. Feng Y, Chen R, Stegen JC, Guo Z, Zhang J, Li Z, Lin X: **Two key features influencing**  
831 **community assembly processes at regional scale: Initial state and degree of change**  
832 **in environmental conditions.** *Molecular ecology* 2018, **27**:5238-5251.
- 833 73. Guindon S, Dufayard J-F, Lefort V, Anisimova M, Hordijk W, Gascuel O: **New algorithms**  
834 **and methods to estimate maximum-likelihood phylogenies: assessing the**  
835 **performance of PhyML 3.0.** *Systematic biology* 2010, **59**:307-321.
- 836 74. Edgar RC: **MUSCLE: multiple sequence alignment with high accuracy and high**  
837 **throughput.** *Nucleic acids research* 2004, **32**:1792-1797.

- 838 75. Stegen JC, Lin X, Fredrickson JK, Konopka AE: **Estimating and mapping ecological**  
839 **processes influencing microbial community assembly.** *Front Microbiol* 2015, **6**:370.
- 840 76. Chase JM, Kraft NJ, Smith KG, Vellend M, Inouye BD: **Using null models to disentangle**  
841 **variation in community dissimilarity from variation in  $\alpha$ -diversity.** *Ecosphere* 2011,  
842 **2**:1-11.
- 843 77. Richter-Heitmann T, Hofner B, Krah FS, Sikorski J, Wust PK, Bunk B, Huang S, Regan  
844 KM, Berner D, Boeddinghaus RS, et al: **Stochastic dispersal rather than deterministic**  
845 **selection explains the spatio-temporal distribution of soil bacteria in a temperate**  
846 **grassland.** *Front Microbiol* 2020, **11**:1391.
- 847 78. Ramoneda J, Le Roux JJ, Frossard E, Frey B, Gamper HA: **Experimental assembly**  
848 **reveals ecological drift as a major driver of root nodule bacterial diversity in a woody**  
849 **legume crop.** *FEMS Microbiology Ecology* 2020, **96**:fiae083.
- 850 79. Wang JJ: **Examining the full effects of landscape heterogeneity on spatial genetic**  
851 **variation: a multiple matrix regression approach for quantifying geographic and**  
852 **ecological isolation.** *Evolution* 2013, **67**:3403-3411.
- 853 80. Assis J, Tyberghein L, Bosch S, Verbruggen H, Serrão EA, De Clerck O: **Bio-ORACLE v2.**  
854 **0: Extending marine data layers for bioclimatic modelling.** *Global Ecology and*  
855 *Biogeography* 2018, **27**:277-284.
- 856 81. Vavrek MJ: **Fossil: palaeoecological and palaeogeographical analysis tools.**  
857 *Palaeontologia Electronica* 2011, **14**:16.
- 858 82. Adamack AT, Gruber B: **PopGenReport: simplifying basic population genetic analyses**  
859 **in R.** *Methods in Ecology and Evolution* 2014, **5**:384-387.
- 860 83. Kuhner MK: **LAMARC 2.0: maximum likelihood and Bayesian estimation of**  
861 **population parameters.** *Bioinformatics* 2006, **22**:768-770.
- 862 84. Halsey SJ, Bell TJ, McEachern K, Pavlovic NB: **Comparison of reintroduction and**  
863 **enhancement effects on metapopulation viability.** *Restoration Ecology* 2015, **23**:375-  
864 384.
- 865 85. Ochman H, Elwyn S, Moran NA: **Calibrating bacterial evolution.** *Proceedings of the*  
866 *National Academy of Sciences* 1999, **96**:12638-12643.
- 867 86. Turon X, Antich A, Palacín C, Præbel K, Wangensteen OS: **From metabarcoding to**  
868 **metaphylogeography: separating the wheat from the chaff.** *Ecological Applications*  
869 2020, **30**:e02036.
- 870 87. Pesant S, Not F, Picheral M, Kandels-Lewis S, Le Bescot N, Gorsky G, Iudicone D,  
871 Karsenti E, Speich S, Troublé R: **Open science resources for the discovery and analysis**  
872 **of Tara Oceans data.** *Scientific data* 2015, **2**:1-16.
- 873 88. Ceballos SG, Lessa EP, Licandeo R, Fernandez DA: **Genetic relationships between**  
874 **Atlantic and Pacific populations of the notothenioid fish *Eleginops maclovinus*: the**  
875 **footprints of Quaternary glaciations in Patagonia.** *Heredity (Edinb)* 2016, **116**:372-  
876 377.
- 877 89. Trovant B, Orensanz JM, Ruzzante DE, Stotz W, Basso NG: **Scorched mussels**  
878 **(BIVALVIA: MYTILIDAE: BRACHIDONTINAE) from the temperate coasts of South**  
879 **America: phylogenetic relationships, trans-Pacific connections and the footprints of**  
880 **Quaternary glaciations.** *Mol Phylogenet Evol* 2015, **82 Pt A**:60-74.
- 881 90. Iriarte PF, González-Wevar C, Segovia N, Rosenfeld S, Hüne M, Fainburg L, Nuñez JD,  
882 Haye P, Poulin E: **Quaternary ice sheets and sea level regression drove divergence in**  
883 **a marine gastropod along Eastern and Western coasts of South America.** *Scientific*  
884 *Reports* 2020, **10**:1-15.



- 885 91. Phillipot H: **Physical geography–climate**. *Antarctica* 1985:23.
- 886 92. Arkhipkin AI, Middleton D, Sirota A, Grzebielec R: **The effect of Falkland Current**  
887 **inflows on offshore ontogenetic migrations of the squid *Loligo gahi* on the southern**  
888 **shelf of the Falkland Islands**. *Estuarine, Coastal and Shelf Science* 2004, **60**:11-22.
- 889 93. Nagylaki T: **The strong-migration limit in geographically structured populations**.  
890 *Journal of mathematical biology* 1980, **9**:101-114.
- 891 94. Charlesworth D: **Effects of inbreeding on the genetic diversity of populations**.  
892 *Philosophical Transactions of the Royal Society of London Series B: Biological Sciences*  
893 2003, **358**:1051-1070.
- 894 95. Thornhill DJ, Mahon AR, Norenburg JL, Halanych KM: **Open-ocean barriers to**  
895 **dispersal: a test case with the Antarctic Polar Front and the ribbon worm *Parborlasia***  
896 ***corrugatus* (Nemertea: Lineidae)**. *Mol Ecol* 2008, **17**:5104-5117.
- 897 96. Hunter RL, Halanych KM: **Evaluating connectivity in the brooding brittle star**  
898 ***Astrofoma agassizii* across the Drake Passage in the Southern Ocean**. *Journal of*  
899 *Heredity* 2008, **99**:137-148.
- 900 97. Bargelloni L, Marcato S, Zane L, Patarnello T: **Mitochondrial phylogeny of**  
901 **notothenioids: a molecular approach to Antarctic fish evolution and biogeography**.  
902 *Systematic Biology* 2000, **49**:114-129.
- 903 98. González-Wevar CA, Hüne M, Cañete JI, Mansilla A, Nakano T, Poulin E: **Towards a**  
904 **model of postglacial biogeography in shallow marine species along the Patagonian**  
905 **Province: lessons from the limpet *Nacella magellanica* (Gmelin, 1791)**. *BMC*  
906 *Evolutionary Biology* 2012, **12**:139.
- 907 99. Orsini L, Vanoverbeke J, Swillen I, Mergeay J, De Meester L: **Drivers of population**  
908 **genetic differentiation in the wild: isolation by dispersal limitation, isolation by**  
909 **adaptation and isolation by colonization**. *Molecular ecology* 2013, **22**:5983-5999.
- 910 100. Güller M, Puccinelli E, Zelaya DG: **The Antarctic Circumpolar Current as a dispersive**  
911 **agent in the Southern Ocean: evidence from bivalves**. *Marine Biology* 2020, **167**.
- 912 101. Macaya EC, Zuccarello GC: **DNA Barcoding and genetic divergence in the Giant Kelp**  
913 ***Macrocystis* (Laminariales) 1**. *Journal of Phycology* 2010, **46**:736-742.
- 914 102. Leese F, Agrawal S, Held C: **Long-distance island hopping without dispersal stages:**  
915 **transportation across major zoogeographic barriers in a Southern Ocean isopod**.  
916 *Naturwissenschaften* 2010, **97**:583-594.
- 917 103. Fraser CI, Morrison A, Rojas PO: **Biogeographic Processes Influencing Antarctic and**  
918 **sub-Antarctic Seaweeds**. In *Antarctic Seaweeds*. Springer; 2020: 43-57
- 919 104. Sul WJ, Oliver TA, Ducklow HW, Amaral-Zettler LA, Sogin ML: **Marine bacteria exhibit**  
920 **a bipolar distribution**. *Proc Natl Acad Sci U S A* 2013, **110**:2342-2347.
- 921 105. Logares R, Deutschmann IM, Junger PC, Giner CR, Krabberod AK, Schmidt TSB, Rubinat-  
922 Ripoll L, Mestre M, Salazar G, Ruiz-Gonzalez C, et al: **Disentangling the mechanisms**  
923 **shaping the surface ocean microbiota**. *Microbiome* 2020, **8**:55.
- 924 106. Sunagawa S, Coelho LP, Chaffron S, Kultima JR, Labadie K, Salazar G, Djahanschiri B,  
925 Zeller G, Mende DR, Alberti A: **Structure and function of the global ocean microbiome**.  
926 *Science* 2015, **348**.
- 927 107. Milici M, Vital M, Tomasch J, Badewien TH, Giebel HA, Plumeier I, Wang H, Pieper DH,  
928 Wagner-Döbler I, Simon M: **Diversity and community composition of particle-**  
929 **associated and free-living bacteria in mesopelagic and bathypelagic Southern Ocean**  
930 **water masses: Evidence of dispersal limitation in the Bransfield Strait**. *Limnology and*  
931 *Oceanography* 2017, **62**:1080-1095.

- 932 108. Mestre M, Hofer J: **The Microbial Conveyor Belt: Connecting the Globe through**  
933 **Dispersion and Dormancy.** *Trends Microbiol* 2020.
- 934 109. Locey KJ: **Synthesizing traditional biogeography with microbial ecology: the**  
935 **importance of dormancy.** *Journal of Biogeography* 2010, **37**:1835-1841.
- 936 110. Miyazaki M, Sakai S, Yamanaka Y, Saito Y, Takai K, Imachi H: ***Spirochaeta psychrophila***  
937 **sp. nov., a psychrophilic spirochaete isolated from seafloor sediment, and**  
938 **emended description of the genus *Spirochaeta*.** *Int J Syst Evol Microbiol* 2014,  
939 **64**:2798-2804.
- 940 111. Hakim JA: *Comparison of gut microbiomes in laboratory cultured sea urchins revealing*  
941 *selective attributes of microbial composition based upon their feed and surroundings.*  
942 The University of Alabama at Birmingham; 2015.
- 943 112. Petro C, Starnawski P, Schramm A, Kjeldsen KU: **Microbial community assembly in**  
944 **marine sediments.** *Aquatic Microbial Ecology* 2017, **79**:177-195.
- 945 113. Meysman FJ, Middelburg JJ, Heip CH: **Bioturbation: a fresh look at Darwin's last idea.**  
946 *Trends in Ecology & Evolution* 2006, **21**:688-695.
- 947 114. Grossart H-P, Dziallas C, Leunert F, Tang KW: **Bacteria dispersal by hitchhiking on**  
948 **zooplankton.** *Proceedings of the National Academy of Sciences* 2010, **107**:11959-  
949 11964.
- 950 115. Serebryakova A, Aires T, Viard F, Serrao EA, Engelen AH: **Summer shifts of bacterial**  
951 **communities associated with the invasive brown seaweed *Sargassum muticum* are**  
952 **location and tissue dependent.** *PLoS One* 2018, **13**:e0206734.
- 953 116. Bowley J, Baker-Austin C, Porter A, Hartnell R, Lewis C: **Oceanic hitchhikers—assessing**  
954 **pathogen risks from marine microplastic.** *Trends in Microbiology* 2020.
- 955 117. Louca S, Parfrey LW, Doebeli M: **Decoupling function and taxonomy in the global**  
956 **ocean microbiome.** *Science* 2016, **353**:1272-1277.
- 957 118. Martiny JB, Eisen JA, Penn K, Allison SD, Horner-Devine MC: **Drivers of bacterial  $\beta$ -**  
958 **diversity depend on spatial scale.** *Proceedings of the National Academy of Sciences*  
959 2011, **108**:7850-7854.
- 960 119. Sintès E, De Corte D, Ouillon N, Herndl GJ: **Macroecological patterns of archaeal**  
961 **ammonia oxidizers in the Atlantic Ocean.** *Molecular ecology* 2015, **24**:4931-4942.
- 962 120. Zhou J, Ning D: **Stochastic community assembly: does it matter in microbial ecology?**  
963 *Microbiology and Molecular Biology Reviews* 2017, **81**.
- 964 121. Vellend M: *The theory of ecological communities.* Princeton: Princeton University  
965 Press; 2016.
- 966 122. Nemergut DR, Schmidt SK, Fukami T, O'Neill SP, Bilinski TM, Stanish LF, Knelman JE,  
967 Darcy JL, Lynch RC, Wickey P: **Patterns and processes of microbial community**  
968 **assembly.** *Microbiology and Molecular Biology Reviews* 2013, **77**:342-356.
- 969 123. Langenheder S, Lindstrom ES: **Factors influencing aquatic and terrestrial bacterial**  
970 **community assembly.** *Environ Microbiol Rep* 2019, **11**:306-315.
- 971 124. Thompson JR, Pacocha S, Pharino C, Klepac-Ceraj V, Hunt DE, Benoit J, Sarma-  
972 Rupavtarm R, Distel DL, Polz MF: **Genotypic diversity within a natural coastal**  
973 **bacterioplankton population.** *Science* 2005, **307**:1311-1313.
- 974 125. Chust G, Villarino E, Chenuil A, Irigoien X, Bizsel N, Bode A, Broms C, Claus S, Fernandez  
975 de Puellas ML, Fonda-Umani S, et al: **Dispersal similarly shapes both population**  
976 **genetics and community patterns in the marine realm.** *Sci Rep* 2016, **6**:28730.

- 977 126. Zure M, Fernandez-Guerra A, Munn CB, Harder J: **Geographic distribution at**  
978 **subspecies resolution level: closely related Rhodopirellula species in European**  
979 **coastal sediments.** *ISME J* 2017, **11**:478-489.
- 980 127. White TA, Stamford J, Rus Hoelzel A: **Local selection and population structure in a**  
981 **deep-sea fish, the roundnose grenadier (*Coryphaenoides rupestris*).** *Molecular*  
982 *Ecology* 2010, **19**:216-226.
- 983 128. Everroad RC, Wood AM: **Phycoerythrin evolution and diversification of spectral**  
984 **phenotype in marine Synechococcus and related picocyanobacteria.** *Molecular*  
985 *Phylogenetics and Evolution* 2012, **64**:381-392.
- 986 129. Shapiro BJ, Friedman J, Cordero OX, Preheim SP, Timberlake SC, Szabó G, Polz MF, Alm  
987 EJ: **Population genomics of early events in the ecological differentiation of bacteria.**  
988 *science* 2012, **336**:48-51.
- 989 130. Heino J, Melo AS, Siqueira T, Soininen J, Valanko S, Bini LM: **Metacommunity**  
990 **organisation, spatial extent and dispersal in aquatic systems: patterns, processes and**  
991 **prospects.** *Freshwater Biology* 2015, **60**:845-869.
- 992 131. Logares R, Tesson SVM, Canback B, Pontarp M, Hedlund K, Rengefors K: **Contrasting**  
993 **prevalence of selection and drift in the community structuring of bacteria and**  
994 **microbial eukaryotes.** *Environ Microbiol* 2018, **20**:2231-2240.
- 995 132. Nosil P, Egan SP, Funk DJ: **Heterogeneous genomic differentiation between walking-**  
996 **stick ecotypes: "isolation by adaptation" and multiple roles for divergent selection.**  
997 *Evolution* 2008, **62**:316-336.
- 998

999 **Figure and table titles:**

1000 **Figure 1.** Sampling localities across the Southern Ocean, encompassing Possession Bay and  
1001 Puerto Deseado in Atlantic Patagonia (PAT1 and PAT2, respectively), King George Island in  
1002 Maritime Antarctica (KGI), and Port-aux-Français in Kerguelen Islands (KER).

1003 **Figure 2.** NMDS scatter diagram of the *Spirochaeta* OTUs composition in gut tissue samples  
1004 across the localities.

1005 **Figure 3.** Clustering of *Spirochaeta* OTUs based on their relative abundances in each site.

1006 **Figure 4.** Median-joining oligotype networks of the three selected OTUs of *Spirochaeta*.

1007 **Figure 5.** Gene flows summary and proposed dispersal routes across the Southern Ocean for each  
1008 *Spirochaeta* taxa.

1009 **Table 1.** Experimental design and sequencing data.

1010 **Table 2.** Summary of oligotypes number and genetic indices per OTU and per site for the three  
1011 most abundant *Spirochaeta* OTUs found in all sampling localities.

1012 **Table 3.** Genetic ( $F_{ST}$ ) and phylogeographic structure ( $\phi_{ST}$ ) of the *Spirochaeta* populations among  
1013 localities.

1014 **Table 4.** Effective numbers of migrants per generation ( $N_m$ ) among *Spirochaeta* populations of  
1015 the OTU6, OTU7 and OTU40.

1016 **Table 5.** Quantitative parsing of ecological processes driving populations turnover within  
1017 *Spirochaeta* OTUs.

1018 **Table 6.** Multiple Matrix Regression with Randomization (MMRR) to quantify the relative effects  
1019 of isolation by distance (IBD) and isolation by environment (IBE) on oligotypes assemblage within  
1020 *Spirochaeta* OTUs.

1021 **Figure and table legends:**

1022 **Figure 1.** The Antarctic Polar Front (APF) and the Southern Antarctic Circumpolar Front (SACCF)  
1023 are represented.

1024 **Figure 2.** Presence/absence matrix converted in Bray-Curtis distances (left panel) and Unweighted  
1025 Unifrac distance (right panel). Colors are assigned to the locality.

1026 **Figure 3.** Clustering of Bray-Curtis distances matrix using the complete linkage method. The  
1027 size of the circles indicates the repartition of a given OTU sequences among the 4 localities.  
1028 The percentages indicate the OTUs' proportions in the *Spirochaeta* dataset. Framed labels and  
1029 black arrows indicate the selected OTUs that were selected to be process through the Minimum  
1030 Decomposition Entropy pipeline (MED).

1031 **Figure 4.** Each circle represents a distinct oligotype. Colors indicate the locality of provenance.  
1032 Circle size is scaled on the oligotype frequency normalized by the number of sequences in each  
1033 locality, within the corresponding OTU dataset. Raw abundances are provided in Table S3.

1034 **Figure 5.** Only the gene flows with Nm values  $> 0.25$  are graphically represented. Discontinuous  
1035 arrows represent Nm values  $> 0.25$  and  $< 1$ , continuous arrow represent Nm values  $> 1$ .  
1036 Continuous arrows' width is proportional to Nm values.

1037 **Table 1.** N: number of samples, Nseq.: total number of cleaned sequences obtained, Relat.  
1038 Abund.: (relative abundance in the global dataset).

1039 **Table 2.**  $N$ : number of sequences,  $k$ : number of oligotypes,  $S$ : number of polymorphic sites,  $H$ :  
1040 genetic diversity,  $\Pi$ : mean number of pairwise diversity. The mean and standard deviation were  
1041 calculated from a total of 1,000 bootstraps, performed by randomly subsampling per site a  
1042 number of sequences equal to the minimum number of sequences obtained among sites for a  
1043 given OTU. \*In the case of OTU40, the number of sequences in the PAT2 site was used to  
1044 perform the resampling.

1045 **Table 3.** Structure values are beneath each diagonal and  $p$ -values are above them.  $p$ -values were  
1046 obtained through 1,000 permutations and the significance level was set  $< 0.05$ .  $p$ -values of 0  
1047 indicate value  $< 0.00001$ .

1048 **Table 4.** Only gene flows with Nm values  $> 0.25$  are considered as significant. Mean and standard  
1049 deviation values were calculated from the 10 runs performed for each OTU.

1050 **Table 5.** According to the Stegen et al. (2013) approach, percentage refers to the percentage of  
1051 pairs of communities that appear to be driven by either homogeneous selection, homogenizing  
1052 dispersal, ecological drift, dispersal limitation or variable selection.

1053 **Table 6.** The first statistical test (t) individually estimates the effect of the environmental distance  
1054 and the geographic distance matrices, whereas the second one (F) evaluates the global fit of the  
1055 model considering both distance matrices. *p*-values are considered as significant < 0.05.

1056 **Supplementary material:**

1057 **Additional file 1.** Pairwise PERMANOVA on *Spirochaeta* OTUs composition dissimilarities  
1058 among localities. *p*-values are adjusted using the default Bonferroni method implemented in  
1059 the *pairwiseAdonis* R package and are considered as significant < 0.05.

1060 **Additional file 2.** Abundance and closest sequence retrieved from Blast analysis for each of the  
1061 three OTUs analysed through the MED pipeline.

1062 (1) Bowman JP, McCuaig RD: **Biodiversity, community structural shifts, and biogeography of**  
1063 **prokaryotes within Antarctic continental shelf sediment.** *Appl Environ Microbiol* 2003, **69**:2463-  
1064 2483.

1065 (2) Acosta-González A, Rosselló-Móra R, Marqués S: **Characterization of the anaerobic**  
1066 **microbial community in oil-polluted subtidal sediments: aromatic biodegradation potential**  
1067 **after the Prestige oil spill.** *Environmental microbiology* 2013, **15**:77-92.

1068 **Additional file 3.** Relative contribution of each locality in the total abundance of OTU6, OTU7  
1069 and OTU40 sequences. Colors are assigned to the different localities.

1070 **Additional file 4.** Summary of number of oligotypes in each locality and per OTU of *Spirochaeta*.

1071 **Additional file 5.** Accumulation curves of OTU6 (A), OTU7 (B) and OTU40 (C) oligotypes  
1072 richness. Colors are assigned to each locality. Extrapolation is calculated from Hill numbers of  
1073 richness (q=0).
